# Supplementary material for: High Sodium Intake: A Silent Killer Driving Global Gastric Cancer Burden
Source: Research Square preprint supplement (doi:10.21203/rs.3.rs-5037516/v1), 2025-07-15
Supplement: Supplementary file 1 [file 587e598ec11dacb67eb08bf5.docx]

**Table S2** Trends in stomach cancer Disability-Adjusted Life Years related to high sodium intake across 204 countries from 1990 to 2021.

|  |  |  |  |  |  | |  |  | | |  |  |  |
| --- | --- | --- | --- | --- | --- | --- | --- | --- | --- | --- | --- | --- | --- |
|  | |  | DALYs | | |  | | | | ASDR | | | | Trend | |
| Characteristics | |  | 1990 (95%UI) | 2021 (95%UI) | Changes of number (%) | |  | | 1990 (95%UI) | | 2021 (95%UI) | Percent of change (%) |  | EAPC (95%CI) | Net drift (95%CI) |
| Cambodia | |  | 1866.89 (-0.00*-10015.85) | 2814.24 (0.00*-13956.35) | 50.74 (-91.10-108.39) | |  | | 36.70 (-0.00*-195.64) | | 21.06 (0.00*-104.42) | -42.62 (-98.97--22.04) |  | -1.98 (-2.08--1.87) | -1.76 (-2.14--1.39) |
| Democratic People's Republic of Korea | |  | 10912.67 (-0.00*-54774.63) | 16585.37 (-0.00*-85026.12) | 51.98 (-62.52-108.17) | |  | | 61.06 (-0.00*-305.53) | | 48.47 (-0.00*-249.15) | -20.61 (-67.85-8.39) |  | -0.77 (-0.88--0.65) | -0.73 (-0.87--0.6) |
| Taiwan (Province of China) | |  | 6438.51 (0.00*-32661.60) | 6400.41 (0.00*-32826.07) | -0.59 (-90.01-23.78) | |  | | 38.17 (0.00*-193.09) | | 15.52 (0.00*-79.60) | -59.34 (-96.70--52.29) |  | -3.30 (-3.50--3.10) | -2.95 (-3.08--2.82) |
| China | |  | 892814.81 (-0.04-4340139.74) | 883434.61 (-0.01-4461210.86) | -1.05 (-69.43-27.16) | |  | | 98.40 (-0.00*-478.50) | | 41.46 (-0.00*-208.59) | -57.87 (-84.39--45.68) |  | -2.91 (-3.11--2.72) | -2.62 (-2.77--2.47) |
| Indonesia | |  | 23391.42 (-0.00*-122084.03) | 37686.19 (-0.00*-189056.63) | 61.11 (-86.29-110.99) | |  | | 20.82 (-0.00*-107.86) | | 14.58 (0.00*-73.62) | -29.97 (-94.91--9.92) |  | -1.11 (-1.19--1.04) | -0.95 (-1.04--0.86) |
| Philippines | |  | 4082.19 (0.00*-20610.02) | 8288.36 (0.00*-42711.68) | 103.04 (-52.01-146.28) | |  | | 11.82 (0.00*-59.59) | | 9.21 (0.00*-47.21) | -22.12 (-85.30--6.63) |  | -0.72 (-0.81--0.63) | -0.86 (-1.14--0.59) |
| Lao People's Democratic Republic | |  | 902.79 (0.00*-4721.41) | 891.88 (0.00*-4530.17) | -1.21 (-84.40-35.18) | |  | | 38.99 (0.00*-203.26) | | 17.38 (0.00*-88.01) | -55.42 (-92.73--37.73) |  | -2.81 (-2.90--2.72) | -2.5 (-3.21--1.8) |
| Sri Lanka | |  | 2067.35 (-0.00*-10071.10) | 1961.79 (0.00*-10182.93) | -5.11 (-86.04-35.61) | |  | | 17.66 (-0.00*-86.39) | | 7.18 (0.00*-37.42) | -59.32 (-93.01--43.89) |  | -3.06 (-3.31--2.82) | -3.01 (-3.28--2.74) |
| Maldives | |  | 20.99 (-0.00*-107.74) | 19.69 (0.00*-101.28) | -6.20 (-106.65-23.69) | |  | | 20.52 (-0.00*-105.03) | | 5.06 (0.00*-25.89) | -75.33 (-99.82--67.11) |  | -4.94 (-5.21--4.66) | -4.59 (-8.47--0.54) |
| Myanmar | |  | 9092.18 (-0.00*-47681.33) | 7695.10 (-0.00*-39007.43) | -15.37 (-98.52-22.47) | |  | | 35.23 (-0.00*-183.22) | | 14.98 (0.00*-75.45) | -57.48 (-97.82--39.83) |  | -3.16 (-3.31--3.01) | -2.84 (-3.01--2.66) |
| Malaysia | |  | 1809.53 (-0.00*-8919.42) | 3613.41 (0.00*-18386.50) | 99.69 (-89.77-130.16) | |  | | 18.20 (-0.00*-90.40) | | 12.29 (0.00*-62.33) | -32.46 (-93.04--22.46) |  | -1.41 (-1.56--1.27) | -1.04 (-1.27--0.8) |
| Thailand | |  | 9566.49 (0.00*-48203.12) | 16593.31 (-0.00*-88976.09) | 73.45 (-91.68-139.00) | |  | | 24.17 (-0.00*-121.39) | | 16.02 (-0.00*-85.40) | -33.72 (-96.44--10.03) |  | -1.73 (-1.91--1.55) | -1.63 (-1.86--1.4) |
| Timor-Leste | |  | 76.11 (-0.00*-400.94) | 135.72 (0.00*-701.86) | 78.32 (-69.27-154.71) | |  | | 22.35 (-0.00*-116.99) | | 15.32 (0.00*-78.81) | -31.47 (-87.36--3.53) |  | -1.15 (-1.44--0.86) | -1.2 (-2.62-0.25) |
| Viet Nam | |  | 13433.72 (0.00*-68381.58) | 17444.78 (0.00*-87541.13) | 29.86 (-125.07-77.91) | |  | | 32.00 (0.00*-162.06) | | 16.32 (0.00*-81.42) | -49.01 (-108.73--30.31) |  | -2.50 (-2.69--2.31) | -2.17 (-2.3--2.05) |
| Kiribati | |  | 19.51 (-0.00*-107.33) | 34.72 (-0.00*-188.66) | 77.98 (-67.49-177.19) | |  | | 47.50 (-0.00*-253.30) | | 42.64 (-0.00*-225.77) | -10.25 (-95.61-31.16) |  | -0.35 (-0.41--0.28) | -0.19 (-3.18-2.9) |
| Fiji | |  | 75.73 (-0.00*-436.09) | 115.21 (-0.00*-627.65) | 52.14 (-83.25-202.96) | |  | | 19.08 (-0.00*-106.74) | | 14.67 (0.00*-79.24) | -23.11 (-106.21-19.84) |  | -0.83 (-1.02--0.63) | -0.75 (-2.03-0.53) |
| Samoa | |  | 13.95 (-0.00*-86.38) | 20.68 (0.00*-125.03) | 48.23 (-1006.88-1847.05) | |  | | 16.43 (-0.00*-99.62) | | 14.28 (0.00*-85.36) | -13.11 (-592.58-844.93) |  | -0.49 (-0.60--0.37) | -0.35 (-2.93-2.29) |
| Solomon Islands | |  | 71.71 (-0.00*-415.13) | 154.52 (-0.00*-847.63) | 115.47 (-112.68-235.01) | |  | | 47.35 (-0.00*-266.68) | | 38.27 (0.00*-203.86) | -19.17 (-125.52-18.37) |  | -0.63 (-0.76--0.51) | -0.58 (-2.62-1.51) |
| Marshall Islands | |  | 8.11 (-0.00*-43.97) | 14.04 (-0.00*-75.43) | 73.07 (-124.00-148.81) | |  | | 44.72 (-0.00*-232.18) | | 34.90 (0.00*-184.28) | -21.95 (-104.89-9.59) |  | -0.74 (-0.83--0.64) | -0.66 (-5.96-4.95) |
| Micronesia (Federated States of) | |  | 23.10 (-0.00*-125.95) | 26.83 (-0.00*-142.61) | 16.14 (-84.19-86.11) | |  | | 44.15 (-0.00*-237.28) | | 33.30 (0.00*-175.38) | -24.57 (-96.58-15.81) |  | -0.93 (-1.03--0.84) | -0.86 (-3.38-1.72) |
| Papua New Guinea | |  | 694.64 (-0.00*-3899.29) | 1530.13 (-0.00*-8512.14) | 120.28 (-72.73-253.78) | |  | | 34.69 (-0.00*-189.60) | | 26.74 (0.00*-145.56) | -22.92 (-93.75-17.26) |  | -0.87 (-0.92--0.82) | -0.8 (-1.38--0.22) |
| Tonga | |  | 21.45 (-0.00*-115.67) | 24.79 (0.00*-130.01) | 15.54 (-100.46-81.46) | |  | | 37.87 (-0.00*-202.85) | | 30.56 (0.00*-159.75) | -19.29 (-98.38-21.07) |  | -0.63 (-0.74--0.52) | -0.48 (-2.39-1.46) |
| Kazakhstan | |  | 9937.78 (-0.00*-49315.96) | 4153.40 (0.00*-21560.52) | -58.21 (-98.02--52.49) | |  | | 73.78 (-0.00*-365.38) | | 21.61 (0.00*-112.23) | -70.72 (-97.79--66.64) |  | -3.82 (-4.01--3.63) | -3.57 (-3.72--3.42) |
| Georgia | |  | 2406.46 (-0.00*-11945.94) | 1282.26 (0.00*-6630.55) | -46.72 (-96.96--40.48) | |  | | 38.06 (-0.00*-188.76) | | 22.66 (0.00*-117.21) | -40.46 (-96.54--33.47) |  | -0.69 (-1.13--0.25) | -1.15 (-1.43--0.88) |
| Vanuatu | |  | 27.20 (-0.00*-153.08) | 61.35 (0.00*-332.96) | 125.50 (-74.49-239.80) | |  | | 39.13 (-0.00*-213.73) | | 31.59 (0.00*-167.94) | -19.28 (-91.42-13.72) |  | -0.85 (-0.92--0.78) | -0.71 (-3.44-2.1) |
| Azerbaijan | |  | 3020.72 (-0.00*-14868.37) | 2983.24 (-0.00*-15762.48) | -1.24 (-99.49-25.89) | |  | | 55.91 (-0.00*-276.11) | | 27.11 (-0.00*-143.45) | -51.52 (-100.48--38.66) |  | -2.45 (-2.59--2.30) | -2.3 (-2.53--2.08) |
| Armenia | |  | 1385.93 (-0.00*-6883.17) | 855.10 (0.00*-4465.05) | -38.30 (-103.35--31.78) | |  | | 47.39 (-0.00*-234.69) | | 20.07 (0.00*-104.48) | -57.65 (-102.93--53.04) |  | -2.53 (-2.74--2.32) | -2.45 (-2.81--2.08) |
| Mongolia | |  | 1297.34 (0.00*-6469.78) | 1903.76 (0.00*-9842.87) | 46.74 (-99.14-88.52) | |  | | 116.56 (0.00*-576.28) | | 73.19 (0.00*-380.58) | -37.20 (-101.28--21.10) |  | -1.89 (-2.06--1.72) | -1.63 (-2.04--1.22) |
| Turkmenistan | |  | 989.68 (0.00*-4877.10) | 901.32 (-0.00*-4762.87) | -8.93 (-104.94-15.70) | |  | | 47.49 (-0.00*-234.31) | | 20.09 (-0.00*-105.89) | -57.69 (-102.35--46.54) |  | -2.84 (-3.15--2.54) | -2.95 (-3.4--2.5) |
| Tajikistan | |  | 1823.17 (-0.00*-9210.45) | 1864.36 (0.00*-9972.53) | 2.26 (-99.48-28.91) | |  | | 62.30 (-0.00*-314.16) | | 28.12 (0.00*-150.18) | -54.86 (-99.48--43.87) |  | -2.57 (-2.77--2.37) | -2.3 (-2.58--2.02) |
| Kyrgyzstan | |  | 2277.57 (0.00*-11235.30) | 1707.16 (0.00*-8951.02) | -25.04 (-88.90--12.79) | |  | | 72.74 (0.00*-359.43) | | 31.59 (0.00*-165.39) | -56.56 (-94.36--49.58) |  | -2.48 (-2.67--2.30) | -2.49 (-2.79--2.2) |
| Uzbekistan | |  | 5651.16 (0.00*-28368.28) | 4784.89 (-0.00*-24425.33) | -15.33 (-102.83-0.79) | |  | | 46.42 (0.00*-232.81) | | 15.99 (0.00*-81.55) | -65.55 (-102.26--58.80) |  | -3.18 (-3.37--2.99) | -3.12 (-3.3--2.94) |
| Bosnia and Herzegovina | |  | 1219.72 (-0.00*-5918.64) | 1006.60 (-0.00*-5168.79) | -17.47 (-57.45-4.91) | |  | | 28.17 (-0.00*-137.30) | | 16.63 (-0.00*-84.94) | -40.96 (-72.44--25.07) |  | -1.89 (-2.07--1.72) | -1.83 (-2.24--1.43) |
| Croatia | |  | 2762.32 (-0.00*-14012.87) | 1323.94 (-0.00*-6552.54) | -52.07 (-92.34--42.09) | |  | | 45.24 (-0.00*-228.51) | | 15.64 (-0.00*-77.58) | -65.44 (-98.02--58.14) |  | -3.40 (-3.51--3.28) | -3.29 (-3.56--3.02) |
| Hungary | |  | 5708.06 (-0.00*-28299.93) | 2537.83 (-0.00*-12449.69) | -55.54 (-82.72--46.97) | |  | | 39.47 (-0.00*-196.42) | | 14.02 (-0.00*-68.82) | -64.47 (-89.65--57.65) |  | -3.32 (-3.51--3.13) | -3.31 (-3.5--3.13) |
| Albania | |  | 716.14 (-0.00*-3578.23) | 808.94 (-0.00*-4220.13) | 12.96 (-79.58-52.96) | |  | | 33.44 (-0.00*-168.87) | | 19.05 (-0.00*-99.74) | -43.03 (-92.85--22.85) |  | -1.70 (-1.95--1.46) | -1.61 (-1.97--1.24) |
| Bulgaria | |  | 5507.61 (-0.00*-27298.42) | 2987.63 (-0.00*-14705.48) | -45.75 (-85.67--34.46) | |  | | 44.89 (-0.00*-222.56) | | 22.76 (-0.00*-112.13) | -49.29 (-82.31--38.68) |  | -1.94 (-2.12--1.76) | -2.04 (-2.31--1.77) |
| Montenegro | |  | 111.86 (-0.00*-542.21) | 135.33 (-0.00*-680.23) | 20.98 (-50.88-51.55) | |  | | 17.54 (-0.00*-84.88) | | 14.08 (-0.00*-70.68) | -19.72 (-69.18-0.01) |  | -0.84 (-1.09--0.60) | -0.77 (-1.68-0.15) |
| Czechia | |  | 4404.74 (-0.00*-21833.74) | 2087.77 (-0.00*-10355.22) | -52.60 (-90.03--43.79) | |  | | 32.21 (-0.00*-159.49) | | 10.23 (-0.00*-50.64) | -68.25 (-92.61--62.06) |  | -3.79 (-3.86--3.72) | -3.61 (-3.81--3.41) |
| North Macedonia | |  | 841.25 (0.00*-3988.13) | 825.04 (-0.00*-4042.65) | -1.93 (-71.33-29.18) | |  | | 43.73 (0.00*-207.42) | | 24.91 (-0.00*-122.52) | -43.04 (-75.17--25.14) |  | -2.11 (-2.34--1.88) | -1.63 (-2.06--1.19) |
| Poland | |  | 17532.05 (0.00*-87991.98) | 10989.52 (0.00*-54420.59) | -37.32 (-85.15-9.66) | |  | | 40.11 (0.00*-201.26) | | 16.25 (0.00*-80.58) | -59.50 (-94.59--33.52) |  | -2.99 (-3.13--2.85) | -2.85 (-2.94--2.76) |
| Romania | |  | 9271.47 (-0.00*-47871.98) | 7321.75 (0.00*-36508.17) | -21.03 (-96.87--8.38) | |  | | 32.75 (-0.00*-168.97) | | 21.42 (0.00*-106.86) | -34.60 (-98.04--24.30) |  | -1.58 (-1.74--1.42) | -1.46 (-1.63--1.3) |
| Serbia | |  | 3027.22 (-0.00*-15051.01) | 2370.37 (-0.00*-11740.52) | -21.70 (-82.76-0.62) | |  | | 27.00 (-0.00*-134.19) | | 15.00 (-0.00*-74.13) | -44.45 (-81.05--27.64) |  | -2.29 (-2.54--2.04) | -2.31 (-2.56--2.07) |
| Slovakia | |  | 2178.21 (-0.00*-10668.47) | 1450.58 (0.00*-7270.11) | -33.41 (-92.88--17.46) | |  | | 36.53 (-0.00*-178.70) | | 15.65 (0.00*-78.59) | -57.15 (-93.25--46.98) |  | -2.66 (-2.77--2.56) | -2.56 (-2.82--2.29) |
| Slovenia | |  | 936.74 (-0.00*-4618.08) | 507.54 (-0.00*-2525.02) | -45.82 (-68.00--34.51) | |  | | 38.05 (-0.00*-187.63) | | 11.93 (-0.00*-59.18) | -68.65 (-83.41--61.76) |  | -3.88 (-4.00--3.76) | -3.6 (-4.04--3.17) |
| Belarus | |  | 7645.34 (-0.00*-41414.85) | 3429.09 (-0.00*-18075.48) | -55.15 (-100.39-38.44) | |  | | 59.39 (-0.00*-320.65) | | 22.55 (-0.00*-118.46) | -62.03 (-98.56-27.92) |  | -3.76 (-3.98--3.53) | -3.3 (-3.46--3.14) |
| Estonia | |  | 778.80 (-0.00*-4422.35) | 325.06 (-0.00*-1819.02) | -58.26 (-99.07-41.21) | |  | | 38.48 (-0.00*-218.65) | | 13.42 (-0.00*-74.98) | -65.13 (-98.69-22.21) |  | -3.66 (-3.79--3.53) | -3.5 (-4.06--2.94) |
| Latvia | |  | 1624.46 (0.00*-8803.88) | 682.35 (0.00*-3521.05) | -58.00 (-96.57--16.53) | |  | | 46.32 (0.00*-250.83) | | 19.65 (-0.00*-100.56) | -57.58 (-99.75--14.45) |  | -2.98 (-3.15--2.82) | -2.88 (-3.25--2.51) |
| Lithuania | |  | 2129.13 (-0.00*-11206.69) | 1027.23 (-0.00*-5280.80) | -51.75 (-95.74-24.91) | |  | | 47.84 (0.00*-251.53) | | 20.24 (-0.00*-104.25) | -57.68 (-95.47-14.99) |  | -2.73 (-2.88--2.59) | -2.57 (-2.86--2.29) |
| Republic of Moldova | |  | 1771.10 (-0.00*-9554.79) | 908.99 (-0.00*-4912.81) | -48.68 (-100.94-25.88) | |  | | 38.48 (-0.00*-207.59) | | 15.63 (-0.00*-84.42) | -59.38 (-99.21--0.68) |  | -2.38 (-2.73--2.03) | -2.99 (-3.41--2.58) |
| Russian Federation | |  | 123581.04 (-0.00*-628901.09) | 58559.82 (0.00*-294977.13) | -52.61 (-105.35--43.12) | |  | | 67.29 (-0.00*-342.55) | | 25.26 (0.00*-127.12) | -62.46 (-100.21--53.19) |  | -3.39 (-3.52--3.25) | -2.94 (-3.09--2.79) |
| Ukraine | |  | 36202.90 (-0.00*-197249.00) | 14307.12 (-0.00*-79232.61) | -60.48 (-99.42--31.11) | |  | | 51.57 (-0.00*-280.38) | | 19.95 (-0.00*-110.44) | -61.32 (-101.76--26.31) |  | -3.62 (-3.84--3.41) | -3.5 (-3.65--3.36) |
| Brunei Darussalam | |  | 57.56 (0.00*-290.48) | 76.66 (0.00*-387.69) | 33.18 (-79.11-69.77) | |  | | 46.76 (0.00*-237.20) | | 19.53 (0.00*-98.37) | -58.24 (-90.34--47.76) |  | -2.73 (-3.02--2.43) | -2.59 (-4.52--0.63) |
| Japan | |  | 110925.63 (0.00*-544308.90) | 76536.72 (0.00*-383663.82) | -31.00 (-90.73--27.74) | |  | | 65.73 (0.00*-322.56) | | 22.26 (0.00*-111.56) | -66.14 (-94.63--65.09) |  | -3.52 (-3.57--3.47) | -3.48 (-3.56--3.41) |
| Republic of Korea | |  | 40195.08 (0.00*-196098.10) | 21757.16 (0.00*-106997.82) | -45.87 (-102.30--19.67) | |  | | 118.73 (0.00*-580.64) | | 24.08 (0.00*-117.95) | -79.72 (-98.56--71.01) |  | -5.43 (-5.55--5.30) | -5.06 (-5.22--4.89) |
| Singapore | |  | 759.71 (0.00*-3683.69) | 646.05 (0.00*-3206.59) | -14.96 (-66.44--3.38) | |  | | 32.17 (0.00*-157.39) | | 7.62 (0.00*-37.78) | -76.33 (-90.15--73.20) |  | -4.65 (-4.90--4.39) | -4.39 (-4.77--4.01) |
| Australia | |  | 1975.79 (0.00*-10968.86) | 2197.82 (-0.00*-12383.02) | 11.24 (-94.09-109.37) | |  | | 10.26 (0.00*-56.75) | | 5.32 (-0.00*-29.71) | -48.17 (-96.20-24.51) |  | -2.07 (-2.15--1.99) | -1.91 (-2.11--1.71) |
| New Zealand | |  | 627.10 (-0.00*-3277.56) | 611.07 (0.00*-3275.06) | -2.56 (-120.22-107.12) | |  | | 16.26 (-0.00*-84.84) | | 7.79 (0.00*-41.76) | -52.07 (-117.87-7.89) |  | -2.45 (-2.70--2.19) | -2.38 (-2.75--2.02) |
| Andorra | |  | 11.51 (0.00*-62.58) | 14.79 (0.00*-85.56) | 28.47 (-104.34-317.80) | |  | | 19.76 (0.00*-108.15) | | 9.75 (0.00*-56.37) | -50.65 (-102.70-90.03) |  | -2.03 (-2.27--1.78) | -1.9 (-5.03-1.34) |
| Austria | |  | 3199.23 (0.00*-16155.70) | 1368.33 (-0.00*-6945.10) | -57.23 (-97.99--3.75) | |  | | 27.72 (0.00*-140.14) | | 8.04 (0.00*-40.82) | -71.00 (-102.96--37.45) |  | -3.86 (-4.04--3.67) | -3.73 (-3.94--3.51) |
| Belgium | |  | 2947.07 (-0.00*-14810.64) | 1649.28 (-0.00*-8401.05) | -44.04 (-100.14--35.69) | |  | | 19.59 (-0.00*-98.23) | | 7.56 (-0.00*-38.48) | -61.39 (-98.70--55.35) |  | -2.95 (-3.10--2.80) | -2.94 (-3.15--2.73) |
| Cyprus | |  | 126.65 (-0.00*-665.33) | 168.89 (0.00*-889.43) | 33.36 (-91.63-335.14) | |  | | 16.99 (-0.00*-88.57) | | 8.45 (0.00*-44.60) | -50.26 (-77.45-91.84) |  | -1.88 (-2.02--1.74) | -1.84 (-4.41-0.81) |
| Denmark | |  | 1209.25 (0.00*-6296.34) | 851.45 (0.00*-4472.53) | -29.59 (-104.65-55.62) | |  | | 15.96 (-0.00*-82.73) | | 7.71 (0.00*-40.23) | -51.69 (-93.10-21.10) |  | -2.21 (-2.49--1.94) | -2.47 (-2.81--2.13) |
| Finland | |  | 1525.62 (-0.00*-8006.20) | 766.17 (-0.00*-3995.95) | -49.78 (-105.81--8.21) | |  | | 21.97 (-0.00*-114.77) | | 6.68 (-0.00*-34.87) | -69.60 (-104.49--34.28) |  | -3.69 (-3.82--3.56) | -3.59 (-3.89--3.29) |
| France | |  | 12978.76 (0.00*-68947.18) | 9345.20 (-0.00*-49117.16) | -28.00 (-94.88-304.98) | |  | | 16.14 (0.00*-85.72) | | 7.47 (-0.00*-39.32) | -53.71 (-93.31-205.54) |  | -2.19 (-2.30--2.09) | -2.09 (-2.18--2.01) |
| Germany | |  | 29254.27 (0.00*-153643.04) | 17257.39 (0.00*-86397.28) | -41.01 (-87.86-42.43) | |  | | 23.90 (0.00*-125.09) | | 10.09 (0.00*-50.47) | -57.78 (-81.18-15.30) |  | -2.83 (-2.99--2.67) | -2.8 (-2.89--2.71) |
| Greece | |  | 3857.38 (-0.00*-20094.04) | 2623.83 (0.00*-13614.25) | -31.98 (-67.20-128.01) | |  | | 26.03 (0.00*-135.49) | | 12.22 (0.00*-62.73) | -53.05 (-67.68-104.32) |  | -2.67 (-2.89--2.45) | -2.61 (-2.8--2.43) |
| Iceland | |  | 64.08 (0.00*-327.71) | 38.44 (0.00*-201.83) | -40.01 (-82.21-33.02) | |  | | 22.95 (0.00*-117.69) | | 6.92 (0.00*-36.08) | -69.87 (-89.89--30.71) |  | -3.76 (-3.85--3.67) | -3.45 (-4.71--2.17) |
| Ireland | |  | 797.93 (0.00*-4275.28) | 503.25 (-0.00*-2717.30) | -36.93 (-107.91-93.67) | |  | | 19.82 (-0.00*-105.93) | | 6.53 (-0.00*-35.12) | -67.04 (-105.31--4.26) |  | -3.56 (-3.67--3.46) | -3.39 (-3.77--3.01) |
| Israel | |  | 825.49 (0.00*-4310.31) | 978.28 (0.00*-5020.15) | 18.51 (-69.40-259.87) | |  | | 17.35 (0.00*-90.49) | | 8.23 (0.00*-42.16) | -52.55 (-93.66-60.77) |  | -2.75 (-2.92--2.58) | -2.59 (-2.9--2.28) |
| Italy | |  | 28832.90 (0.00*-144128.48) | 16109.46 (-0.00*-82405.00) | -44.13 (-103.13--39.83) | |  | | 33.51 (0.00*-166.96) | | 11.95 (-0.00*-60.43) | -64.32 (-102.94--59.37) |  | -3.27 (-3.33--3.20) | -3.21 (-3.28--3.14) |
| Luxembourg | |  | 117.04 (-0.00*-605.62) | 70.28 (0.00*-365.74) | -39.95 (-105.50-34.90) | |  | | 22.11 (-0.00*-114.17) | | 6.68 (0.00*-34.69) | -69.79 (-111.90--33.05) |  | -3.74 (-3.82--3.67) | -3.87 (-4.9--2.83) |
| Malta | |  | 96.33 (0.00*-490.04) | 71.89 (0.00*-365.54) | -25.38 (-155.24-43.01) | |  | | 22.49 (0.00*-114.32) | | 7.88 (0.00*-40.12) | -64.95 (-111.51--9.89) |  | -3.20 (-3.33--3.06) | -3.04 (-4.17--1.9) |
| Netherlands | |  | 3775.92 (0.00*-20124.92) | 2355.78 (0.00*-12387.86) | -37.61 (-102.36-87.37) | |  | | 19.33 (0.00*-102.60) | | 7.05 (-0.00*-36.75) | -63.51 (-101.04-19.34) |  | -3.22 (-3.35--3.10) | -3.12 (-3.3--2.94) |
| Portugal | |  | 6252.58 (0.00*-33605.87) | 3959.85 (-0.00*-20796.83) | -36.67 (-62.51-213.10) | |  | | 47.01 (0.00*-252.12) | | 18.46 (-0.00*-94.95) | -60.73 (-81.23-117.91) |  | -2.93 (-3.04--2.82) | -3.02 (-3.17--2.88) |
| Norway | |  | 1103.06 (-0.00*-5818.31) | 524.64 (0.00*-2791.20) | -52.44 (-104.33--12.28) | |  | | 17.20 (-0.00*-90.45) | | 5.45 (0.00*-28.98) | -68.31 (-104.46--47.36) |  | -3.70 (-3.76--3.64) | -3.55 (-3.92--3.18) |
| Sweden | |  | 2167.68 (-0.00*-11258.30) | 1054.57 (0.00*-5509.19) | -51.35 (-94.05--18.27) | |  | | 15.21 (-0.00*-78.16) | | 5.16 (0.00*-26.96) | -66.09 (-94.15--42.76) |  | -3.49 (-3.66--3.32) | -3.43 (-3.69--3.17) |
| Spain | |  | 11552.72 (-0.00*-65693.17) | 7483.95 (0.00*-41726.26) | -35.22 (-137.29-594.71) | |  | | 22.46 (-0.00*-125.38) | | 8.78 (0.00*-47.77) | -60.91 (-125.79-325.83) |  | -2.87 (-2.99--2.75) | -2.96 (-3.05--2.86) |
| United Kingdom | |  | 14942.96 (-0.00*-81248.86) | 7852.96 (-0.00*-42733.41) | -47.45 (-98.33-37.74) | |  | | 16.60 (-0.00*-90.58) | | 6.22 (-0.00*-33.88) | -62.56 (-93.88--0.93) |  | -3.13 (-3.27--3.00) | -2.71 (-2.81--2.61) |
| Switzerland | |  | 1765.94 (-0.00*-9241.54) | 1034.35 (0.00*-5449.95) | -41.43 (-83.97-64.93) | |  | | 17.73 (-0.00*-92.24) | | 6.11 (0.00*-31.85) | -65.54 (-91.91-7.02) |  | -3.11 (-3.45--2.77) | -3.27 (-3.53--3) |
| Argentina | |  | 8635.26 (0.00*-44565.68) | 8671.63 (0.00*-43935.95) | 0.42 (-163.46-73.37) | |  | | 26.69 (0.00*-137.72) | | 15.85 (0.00*-80.22) | -40.63 (-122.56-4.30) |  | -1.42 (-1.59--1.26) | -1.34 (-1.44--1.24) |
| Uruguay | |  | 1169.70 (0.00*-5920.09) | 1032.09 (0.00*-5233.51) | -11.76 (-93.13-34.60) | |  | | 30.80 (0.00*-155.66) | | 20.11 (0.00*-102.22) | -34.70 (-89.24--4.56) |  | -1.48 (-1.58--1.39) | -1.36 (-1.64--1.08) |
| Chile | |  | 6471.89 (0.00*-32468.77) | 6894.09 (0.00*-34596.97) | 6.52 (-116.01-55.53) | |  | | 63.24 (0.00*-317.68) | | 27.13 (0.00*-135.98) | -57.10 (-106.36--36.10) |  | -2.63 (-2.73--2.54) | -2.38 (-2.5--2.25) |
| United States of America | |  | 27283.93 (0.00*-143481.66) | 28189.61 (0.00*-144065.05) | 3.32 (-7.70-1448.20) | |  | | 8.92 (0.00*-46.83) | | 5.38 (0.00*-27.40) | -39.67 (-70.26-870.95) |  | -1.69 (-1.74--1.63) | -1.52 (-1.57--1.47) |
| Canada | |  | 4334.29 (-0.00*-22114.61) | 4428.28 (0.00*-22544.62) | 2.17 (-127.08-140.48) | |  | | 13.45 (-0.00*-68.65) | | 6.63 (0.00*-33.55) | -50.70 (-120.36-44.76) |  | -2.13 (-2.23--2.03) | -1.81 (-1.95--1.68) |
| Antigua and Barbuda | |  | 15.93 (-0.00*-81.40) | 17.44 (-0.00*-92.86) | 9.46 (-105.71-75.17) | |  | | 30.31 (-0.00*-154.49) | | 16.16 (-0.00*-85.68) | -46.67 (-102.44-5.04) |  | -2.00 (-2.17--1.83) | -1.87 (-4.01-0.32) |
| Bahamas | |  | 43.06 (-0.00*-230.82) | 66.58 (-0.00*-365.11) | 54.62 (-110.32-229.05) | |  | | 25.98 (-0.00*-138.09) | | 15.77 (-0.00*-86.67) | -39.29 (-94.16-35.89) |  | -1.59 (-1.72--1.46) | -1.36 (-2.71-0.01) |
| Belize | |  | 20.56 (-0.00*-107.74) | 52.73 (0.00*-276.10) | 156.43 (-262.84-377.83) | |  | | 21.56 (-0.00*-112.75) | | 16.51 (0.00*-86.39) | -23.41 (-131.75-50.52) |  | -1.04 (-1.61--0.46) | -0.63 (-2.19-0.95) |
| Barbados | |  | 75.12 (-0.00*-401.99) | 72.20 (-0.00*-409.66) | -3.88 (-103.69-291.89) | |  | | 26.59 (-0.00*-142.59) | | 14.46 (-0.00*-82.29) | -45.60 (-110.10-109.53) |  | -1.93 (-2.11--1.75) | -1.78 (-2.86--0.7) |
| Dominica | |  | 28.26 (-0.00*-148.58) | 27.86 (-0.00*-146.64) | -1.42 (-101.48-51.48) | |  | | 48.02 (0.00*-252.12) | | 33.29 (-0.00*-175.28) | -30.68 (-106.77-7.16) |  | -1.22 (-1.36--1.07) | -1.1 (-2.88-0.71) |
| Cuba | |  | 1385.56 (-0.00*-7285.69) | 1805.16 (-0.00*-9312.97) | 30.28 (-100.13-100.40) | |  | | 13.48 (0.00*-70.86) | | 9.47 (-0.00*-48.88) | -29.72 (-105.46-4.21) |  | -1.01 (-1.12--0.90) | -1.32 (-1.59--1.05) |
| Dominican Republic | |  | 584.09 (0.00*-3101.89) | 1277.72 (-0.00*-6775.91) | 118.75 (-107.98-303.24) | |  | | 14.82 (0.00*-78.25) | | 12.45 (-0.00*-66.10) | -15.98 (-102.57-29.94) |  | -0.17 (-0.30--0.03) | -0.25 (-0.57-0.08) |
| Grenada | |  | 18.10 (0.00*-93.95) | 16.54 (-0.00*-88.07) | -8.64 (-108.96-50.96) | |  | | 26.44 (-0.00*-137.70) | | 14.34 (-0.00*-75.83) | -45.77 (-106.75-9.85) |  | -1.74 (-1.97--1.51) | -1.49 (-3.49-0.55) |
| Haiti | |  | 1833.42 (-0.00*-9806.13) | 2589.59 (-0.00*-13905.75) | 41.24 (-62.14-266.01) | |  | | 52.78 (-0.00*-283.13) | | 32.74 (-0.00*-174.87) | -37.97 (-95.86-18.02) |  | -1.40 (-1.51--1.29) | -1.36 (-1.7--1.02) |
| Guyana | |  | 102.22 (0.00*-531.19) | 100.24 (-0.00*-561.47) | -1.93 (-84.05-90.96) | |  | | 25.37 (-0.00*-132.50) | | 14.74 (-0.00*-82.09) | -41.90 (-91.24-6.27) |  | -1.50 (-1.77--1.22) | -1.29 (-2.42--0.16) |
| Jamaica | |  | 460.90 (0.00*-2376.20) | 485.77 (0.00*-2648.48) | 5.40 (-100.33-81.82) | |  | | 26.02 (0.00*-134.30) | | 15.73 (0.00*-85.80) | -39.54 (-98.89-6.53) |  | -1.74 (-2.10--1.39) | -1.56 (-1.96--1.16) |
| Saint Vincent and the Grenadines | |  | 22.29 (-0.00*-115.18) | 25.59 (-0.00*-136.97) | 14.79 (-110.69-141.46) | |  | | 31.36 (-0.00*-161.79) | | 18.10 (-0.00*-96.88) | -42.26 (-104.07-13.31) |  | -1.77 (-2.01--1.54) | -1.77 (-3.69-0.18) |
| Saint Lucia | |  | 32.50 (-0.00*-171.45) | 43.98 (-0.00*-244.31) | 35.32 (-99.13-114.70) | |  | | 37.52 (0.00*-197.51) | | 18.38 (-0.00*-102.01) | -51.00 (-99.96--28.60) |  | -2.64 (-2.88--2.40) | -2.55 (-4.07--1) |
| Suriname | |  | 53.55 (0.00*-289.04) | 81.69 (-0.00*-444.70) | 52.55 (-122.85-196.55) | |  | | 20.27 (0.00*-108.85) | | 12.64 (-0.00*-69.06) | -37.64 (-107.37-16.11) |  | -1.45 (-1.69--1.22) | -1.32 (-2.44--0.18) |
| Trinidad and Tobago | |  | 167.45 (-0.00*-882.82) | 180.33 (0.00*-939.78) | 7.69 (-99.42-146.13) | |  | | 19.65 (-0.00*-103.45) | | 9.44 (0.00*-49.15) | -51.95 (-105.19-5.05) |  | -2.57 (-2.80--2.34) | -2.42 (-3.28--1.55) |
| Bolivia (Plurinational State of) | |  | 3285.83 (0.00*-16547.44) | 5259.45 (0.00*-26842.82) | 60.06 (-62.20-123.10) | |  | | 97.64 (0.00*-491.71) | | 56.47 (0.00*-288.20) | -42.17 (-99.38--19.53) |  | -1.85 (-1.94--1.77) | -1.82 (-2.01--1.63) |
| Peru | |  | 6922.63 (0.00*-35443.33) | 12292.62 (0.00*-63937.65) | 77.57 (-61.69-166.11) | |  | | 54.88 (0.00*-280.51) | | 36.04 (0.00*-187.32) | -34.34 (-88.97--1.95) |  | -1.70 (-1.98--1.43) | -1.55 (-1.64--1.46) |
| Ecuador | |  | 3201.51 (0.00*-15958.71) | 5575.62 (0.00*-28478.25) | 74.16 (-65.98-132.28) | |  | | 57.91 (0.00*-289.90) | | 33.62 (0.00*-171.72) | -41.94 (-87.73--22.88) |  | -1.88 (-2.28--1.48) | -1.47 (-1.61--1.33) |
| Colombia | |  | 11274.12 (-0.00*-56725.45) | 14939.75 (-0.00*-76562.64) | 32.51 (-73.66-74.72) | |  | | 60.69 (-0.00*-303.31) | | 27.16 (-0.00*-139.11) | -55.25 (-89.89--41.01) |  | -2.92 (-3.07--2.76) | -2.66 (-2.74--2.58) |
| El Salvador | |  | 1237.91 (0.00*-6244.91) | 2135.40 (0.00*-10918.73) | 72.50 (-52.46-174.79) | |  | | 39.75 (0.00*-200.31) | | 34.85 (0.00*-178.14) | -12.32 (-88.22-51.20) |  | -0.79 (-1.03--0.56) | -0.59 (-0.8--0.38) |
| Costa Rica | |  | 1218.41 (0.00*-6028.40) | 1765.74 (-0.00*-8912.06) | 44.92 (-76.59-101.50) | |  | | 67.48 (0.00*-334.34) | | 32.07 (-0.00*-161.83) | -52.48 (-97.24--33.01) |  | -2.78 (-3.01--2.54) | -2.45 (-2.67--2.22) |
| Honduras | |  | 797.13 (0.00*-3964.24) | 2436.27 (0.00*-12395.82) | 205.63 (-99.09-324.01) | |  | | 35.34 (0.00*-176.07) | | 37.28 (0.00*-189.21) | 5.49 (-106.39-44.80) |  | 0.32 (0.16-0.48) | 0.1 (-0.24-0.43) |
| Nicaragua | |  | 458.41 (0.00*-2334.71) | 979.37 (0.00*-4999.73) | 113.64 (-33.03-228.61) | |  | | 27.27 (0.00*-138.44) | | 18.95 (0.00*-96.48) | -30.51 (-67.64-13.54) |  | -1.13 (-1.37--0.88) | -0.98 (-1.33--0.62) |
| Guatemala | |  | 2174.09 (0.00*-10800.57) | 5396.09 (0.00*-27892.64) | 148.20 (-202.17-236.85) | |  | | 58.91 (0.00*-293.38) | | 46.77 (0.00*-242.03) | -20.61 (-111.52-10.67) |  | -1.15 (-1.80--0.50) | -0.79 (-0.99--0.59) |
| Mexico | |  | 12327.83 (-0.00*-63326.48) | 22345.98 (-0.00*-116943.20) | 81.26 (-99.54-214.31) | |  | | 27.82 (-0.00*-142.03) | | 17.14 (-0.00*-89.36) | -38.41 (-97.34-21.30) |  | -1.74 (-1.88--1.59) | -1.7 (-1.79--1.61) |
| Panama | |  | 410.44 (0.00*-2045.23) | 833.27 (0.00*-4404.98) | 103.02 (-106.08-182.14) | |  | | 26.59 (-0.00*-132.63) | | 18.87 (0.00*-99.69) | -29.06 (-103.75--0.53) |  | -1.13 (-1.29--0.97) | -0.9 (-1.26--0.55) |
| Venezuela (Bolivarian Republic of) | |  | 3898.01 (-0.00*-19405.61) | 6464.82 (0.00*-33104.25) | 65.85 (-17.16-176.08) | |  | | 38.29 (-0.00*-191.20) | | 21.23 (0.00*-108.69) | -44.56 (-78.45--6.61) |  | -2.35 (-2.55--2.15) | -2.09 (-2.22--1.95) |
| Paraguay | |  | 454.30 (0.00*-2320.64) | 963.44 (0.00*-5024.82) | 112.07 (-64.01-222.80) | |  | | 19.72 (0.00*-100.22) | | 16.13 (0.00*-83.90) | -18.19 (-91.71-21.66) |  | -0.94 (-1.18--0.71) | -0.82 (-1.16--0.47) |
| Brazil | |  | 35485.29 (-0.00*-177282.94) | 48259.56 (-0.00*-247638.54) | 36.00 (-47.86-68.64) | |  | | 37.77 (-0.00*-188.60) | | 18.95 (-0.00*-97.31) | -49.83 (-82.01--39.50) |  | -2.35 (-2.41--2.29) | -2.2 (-2.26--2.15) |
| Algeria | |  | 1004.27 (-0.00*-5941.82) | 1595.65 (-0.00*-9529.45) | 58.89 (-101.22-482.42) | |  | | 7.63 (-0.00*-45.49) | | 4.22 (-0.00*-25.39) | -44.75 (-100.57-102.72) |  | -1.87 (-1.97--1.77) | -1.92 (-2.58--1.26) |
| Bahrain | |  | 32.45 (-0.00*-191.70) | 69.21 (-0.00*-409.77) | 113.29 (-121.22-624.49) | |  | | 16.49 (-0.00*-96.66) | | 6.92 (-0.00*-42.21) | -58.02 (-104.04-128.95) |  | -3.38 (-3.71--3.06) | -2.81 (-7.8-2.44) |
| Egypt | |  | 2127.25 (-0.00*-12029.59) | 6315.05 (0.00*-37758.63) | 196.86 (-122.69-979.25) | |  | | 6.57 (-0.00*-37.37) | | 8.87 (0.00*-53.20) | 34.92 (-124.84-382.96) |  | 2.07 (1.50-2.65) | 1.93 (1.56-2.31) |
| Iran (Islamic Republic of) | |  | 8781.94 (0.00*-50204.60) | 12704.05 (0.00*-74972.66) | 44.66 (-58.56-389.49) | |  | | 30.43 (0.00*-175.31) | | 15.55 (0.00*-92.33) | -48.91 (-84.80-75.31) |  | -1.95 (-2.10--1.79) | -1.88 (-2--1.75) |
| Jordan | |  | 155.44 (-0.00*-876.77) | 396.92 (-0.00*-2290.98) | 155.36 (-95.49-1162.37) | |  | | 9.90 (-0.00*-55.99) | | 4.69 (-0.00*-27.71) | -52.64 (-98.27-183.77) |  | -2.62 (-2.84--2.39) | -2.3 (-3.3--1.29) |
| Iraq | |  | 878.52 (-0.00*-5160.19) | 1799.08 (-0.00*-10740.59) | 104.79 (-90.95-502.13) | |  | | 9.89 (-0.00*-58.08) | | 6.62 (-0.00*-39.91) | -33.10 (-95.30-129.11) |  | -1.56 (-1.65--1.47) | -1.29 (-1.7--0.87) |
| Kuwait | |  | 52.36 (0.00*-276.02) | 134.37 (-0.00*-709.36) | 156.64 (-114.00-487.85) | |  | | 6.99 (0.00*-37.37) | | 3.98 (0.00*-21.48) | -42.98 (-99.30-17.36) |  | -2.04 (-2.49--1.58) | -1.63 (-3.07--0.17) |
| Lebanon | |  | 314.01 (-0.00*-1844.66) | 370.79 (-0.00*-2187.64) | 18.08 (-83.33-483.34) | |  | | 13.70 (-0.00*-81.02) | | 6.22 (-0.00*-36.59) | -54.57 (-94.07-119.80) |  | -2.25 (-2.41--2.09) | -2.16 (-2.81--1.49) |
| Libya | |  | 218.78 (-0.00*-1322.66) | 510.15 (-0.00*-3156.18) | 133.18 (-98.14-745.17) | |  | | 10.54 (-0.00*-63.86) | | 8.46 (-0.00*-52.16) | -19.74 (-104.68-202.38) |  | -0.45 (-0.60--0.29) | -0.46 (-1.12-0.21) |
| Morocco | |  | 675.30 (-0.00*-3875.27) | 1135.29 (-0.00*-6797.13) | 68.12 (-98.83-299.01) | |  | | 4.40 (-0.00*-25.34) | | 3.14 (-0.00*-18.98) | -28.73 (-99.43-109.32) |  | -1.02 (-1.09--0.95) | -1.05 (-1.54--0.56) |
| Palestine | |  | 131.60 (-0.00*-805.71) | 204.58 (-0.00*-1203.88) | 55.46 (-115.27-569.69) | |  | | 14.49 (-0.00*-89.29) | | 7.37 (-0.00*-43.42) | -49.15 (-108.46-126.85) |  | -2.26 (-2.48--2.04) | -2.1 (-3.03--1.15) |
| Qatar | |  | 25.41 (-0.00*-145.04) | 77.50 (-0.00*-435.74) | 204.94 (-101.49-1354.95) | |  | | 18.82 (-0.00*-107.01) | | 6.17 (-0.00*-36.75) | -67.23 (-99.75-42.96) |  | -3.75 (-4.34--3.16) | -3.41 (-7.16-0.5) |
| Oman | |  | 125.26 (0.00*-714.91) | 155.27 (-0.00*-884.33) | 23.95 (-100.73-393.77) | |  | | 15.64 (0.00*-91.83) | | 6.41 (-0.00*-37.75) | -59.01 (-100.15-21.79) |  | -2.55 (-2.70--2.40) | -2.27 (-3.95--0.55) |
| Saudi Arabia | |  | 591.28 (0.00*-3526.56) | 1260.98 (-0.00*-7212.62) | 113.26 (-136.91-948.60) | |  | | 8.68 (0.00*-52.70) | | 4.70 (-0.00*-27.44) | -45.90 (-104.79-138.21) |  | -2.02 (-2.20--1.84) | -1.65 (-2.21--1.09) |
| Syrian Arab Republic | |  | 646.01 (-0.00*-3784.23) | 1000.43 (-0.00*-5849.05) | 54.86 (-101.02-184.56) | |  | | 10.94 (-0.00*-65.25) | | 7.23 (-0.00*-42.50) | -33.90 (-101.02-68.69) |  | -1.57 (-1.75--1.40) | -1.35 (-1.75--0.94) |
| Tunisia | |  | 450.64 (-0.00*-2606.25) | 726.37 (-0.00*-4396.11) | 61.19 (-105.94-434.47) | |  | | 8.39 (-0.00*-49.20) | | 5.29 (-0.00*-31.84) | -36.96 (-102.00-183.83) |  | -1.68 (-1.76--1.59) | -1.51 (-2.35--0.66) |
| Türkiye | |  | 11558.57 (0.00*-69944.72) | 12107.11 (0.00*-73874.67) | #N/A | |  | | 29.87 (0.00*-183.06) | | 12.53 (0.00*-76.78) | #N/A |  | -2.98 (-3.33--2.63) | -2.93 (-3.04--2.81) |
| Yemen | |  | 1978.45 (-0.00*-12384.15) | 3969.49 (-0.00*-26028.11) | 100.64 (-145.00-595.77) | |  | | 34.98 (-0.00*-220.66) | | 24.51 (-0.00*-160.97) | -29.92 (-110.31-160.75) |  | -1.40 (-1.51--1.29) | -1.14 (-1.58--0.69) |
| United Arab Emirates | |  | 114.36 (-0.00*-666.77) | 378.54 (-0.00*-2228.67) | 231.01 (-96.78-1213.67) | |  | | 19.00 (-0.00*-113.86) | | 8.12 (-0.00*-48.99) | -57.27 (-99.70-71.39) |  | -1.68 (-2.17--1.19) | -1.92 (-3.87-0.07) |
| Afghanistan | |  | 4107.66 (-0.00*-25272.02) | 5393.22 (-0.00*-34027.76) | 31.30 (-140.00*-907.14) | |  | | 57.31 (-0.00*-356.12) | | 42.90 (-0.00*-275.01) | -25.15 (-133.01-187.99) |  | -1.16 (-1.42--0.90) | -0.86 (-1.19--0.54) |
| Bangladesh | |  | 10608.08 (0.00*-54919.03) | 14956.14 (0.00*-77504.74) | 40.99 (-16.44-1314.59) | |  | | 20.37 (0.00*-104.95) | | 10.42 (0.00*-53.93) | -48.84 (-71.13-391.25) |  | -2.01 (-2.19--1.83) | -1.64 (-1.86--1.42) |
| India | |  | 93863.70 (0.00*-482094.85) | 149554.57 (0.00*-754254.38) | 59.33 (35.65-174.01) | |  | | 17.43 (0.00*-90.46) | | 11.76 (0.00*-59.40) | -32.50 (-43.77-17.38) |  | -1.16 (-1.28--1.05) | -0.98 (-1.21--0.75) |
| Bhutan | |  | 47.56 (0.00*-254.34) | 66.42 (0.00*-362.42) | 39.66 (-22.71-1094.42) | |  | | 16.61 (0.00*-88.33) | | 10.49 (0.00*-57.20) | -36.82 (-64.02-439.14) |  | -1.41 (-1.54--1.28) | -1.26 (-3.46-0.99) |
| Nepal | |  | 1882.57 (0.00*-10103.94) | 2951.23 (-0.00*-15051.10) | 56.77 (-334.88-1308.85) | |  | | 17.54 (0.00*-93.06) | | 12.08 (-0.00*-61.32) | -31.13 (-89.39-568.22) |  | -1.01 (-1.31--0.72) | -0.98 (-1.33--0.63) |
| Pakistan | |  | 6169.28 (-0.00*-31945.20) | 13277.71 (-0.00*-65439.03) | 115.22 (7.57-1542.83) | |  | | 10.26 (-0.00*-53.22) | | 9.51 (-0.00*-46.81) | -7.27 (-36.82-665.51) |  | -0.47 (-0.77--0.17) | -0.26 (-0.4--0.12) |
| Angola | |  | 996.35 (0.00*-6061.17) | 1937.66 (0.00*-11242.83) | 94.48 (-83.07-851.15) | |  | | 22.24 (0.00*-135.36) | | 14.38 (0.00*-81.79) | -35.35 (-94.44-341.04) |  | -1.60 (-1.68--1.52) | -1.4 (-1.95--0.84) |
| Central African Republic | |  | 375.40 (0.00*-2129.13) | 609.72 (0.00*-3521.55) | 62.42 (-88.89-651.60) | |  | | 28.67 (0.00*-162.10) | | 22.89 (0.00*-132.24) | -20.17 (-93.03-348.73) |  | -0.84 (-0.92--0.75) | -0.71 (-1.76-0.35) |
| Congo | |  | 277.62 (0.00*-1607.26) | 452.14 (0.00*-2618.31) | 62.86 (-92.77-696.43) | |  | | 23.83 (0.00*-138.15) | | 14.53 (-0.00*-82.32) | -39.05 (-101.24-254.05) |  | -1.90 (-2.06--1.74) | -1.68 (-3.07--0.28) |
| Equatorial Guinea | |  | 52.47 (-0.00*-313.94) | 61.20 (0.00*-348.31) | 16.65 (-107.37-700.05) | |  | | 24.64 (0.00*-147.24) | | 10.35 (0.00*-59.07) | -58.00 (-102.83-220.11) |  | -3.17 (-3.54--2.81) | -2.97 (-5.34--0.54) |
| Democratic Republic of the Congo | |  | 2422.36 (0.00*-14459.63) | 4659.05 (0.00*-28099.42) | #N/A | |  | | 14.10 (0.00*-83.72) | | 11.20 (0.00*-67.87) | #N/A |  | -0.70 (-0.75--0.65) | -0.65 (-0.99--0.31) |
| Gabon | |  | 112.41 (0.00*-645.09) | 143.73 (0.00*-824.65) | 27.87 (-100.46-582.64) | |  | | 19.19 (0.00*-109.79) | | 12.75 (0.00*-72.33) | -33.58 (-89.09-328.69) |  | -1.44 (-1.57--1.30) | -1.31 (-2.38--0.22) |
| Burundi | |  | 681.99 (0.00*-3576.92) | 822.81 (-0.00*-4343.09) | 20.65 (-104.85-55.51) | |  | | 26.97 (0.00*-140.64) | | 14.94 (0.00*-77.39) | -44.59 (-101.16--31.44) |  | -2.46 (-2.69--2.23) | -2.15 (-2.9--1.4) |
| Comoros | |  | 44.63 (0.00*-236.59) | 68.26 (0.00*-357.32) | 52.94 (-87.64-103.04) | |  | | 20.45 (0.00*-108.08) | | 13.11 (0.00*-68.40) | -35.92 (-97.35--16.31) |  | -1.72 (-1.88--1.55) | -1.57 (-3.96-0.88) |
| Djibouti | |  | 30.30 (0.00*-160.91) | 101.19 (0.00*-557.17) | 233.92 (-68.19-362.38) | |  | | 18.73 (0.00*-97.98) | | 13.99 (0.00*-74.78) | -25.30 (-90.52-0.92) |  | -1.14 (-1.30--0.97) | -0.98 (-3.96-2.11) |
| Eritrea | |  | 440.53 (0.00*-2221.78) | 641.99 (-0.00*-3511.76) | 45.73 (-106.39-87.09) | |  | | 30.92 (0.00*-160.17) | | 19.77 (-0.00*-107.30) | -36.08 (-101.94--17.43) |  | -1.52 (-1.57--1.47) | -1.21 (-2.79-0.39) |
| Ethiopia | |  | 8247.58 (-0.00*-41968.48) | 6183.29 (-0.00*-33133.62) | -25.03 (-92.92--8.35) | |  | | 35.48 (0.00*-180.82) | | 12.63 (-0.00*-67.11) | -64.40 (-99.30--56.98) |  | -3.90 (-4.12--3.67) | -3.46 (-3.81--3.1) |
| Madagascar | |  | 1054.66 (0.00*-5693.67) | 1651.98 (0.00*-8910.05) | 56.64 (-86.04-98.65) | |  | | 18.80 (0.00*-100.96) | | 12.50 (0.00*-64.66) | -33.52 (-89.82--17.02) |  | -1.40 (-1.46--1.33) | -1.28 (-1.71--0.84) |
| Kenya | |  | 1143.71 (-0.00*-6299.61) | 2828.46 (-0.00*-16302.13) | 147.31 (-39.88-212.49) | |  | | 12.73 (-0.00*-69.29) | | 11.21 (-0.00*-64.41) | -11.98 (-73.81-19.73) |  | -0.05 (-0.29-0.19) | -0.04 (-0.41-0.33) |
| Mauritius | |  | 257.17 (-0.00*-1299.03) | 375.84 (0.00*-1858.13) | 46.14 (-92.78-60.24) | |  | | 32.77 (-0.00*-165.01) | | 20.67 (0.00*-102.35) | -36.92 (-94.21--31.22) |  | -2.25 (-2.65--1.85) | -2.09 (-2.74--1.45) |
| Malawi | |  | 356.72 (0.00*-1774.66) | 515.11 (0.00*-2670.45) | 44.40 (-94.87-84.38) | |  | | 8.34 (0.00*-41.56) | | 6.21 (0.00*-31.89) | -25.60 (-97.01--5.25) |  | -1.32 (-1.62--1.03) | -1.14 (-2.02--0.26) |
| Mozambique | |  | 954.08 (0.00*-4645.90) | 1632.83 (-0.00*-8773.08) | 71.14 (-93.78-112.11) | |  | | 15.65 (0.00*-75.82) | | 14.21 (-0.00*-74.86) | -9.20 (-102.60-12.33) |  | 0.14 (-0.04-0.33) | 0.13 (-0.28-0.53) |
| Rwanda | |  | 939.26 (0.00*-4804.61) | 888.81 (0.00*-4708.20) | -5.37 (-103.25-21.25) | |  | | 29.26 (0.00*-148.19) | | 12.83 (0.00*-66.63) | -56.16 (-99.50--42.21) |  | -3.80 (-4.24--3.37) | -3.35 (-4--2.69) |
| Somalia | |  | 930.74 (0.00*-4781.52) | 1762.21 (0.00*-9243.55) | 89.34 (-62.13-154.85) | |  | | 31.52 (0.00*-159.20) | | 23.87 (0.00*-123.47) | -24.26 (-87.63--5.31) |  | -1.05 (-1.14--0.96) | -0.91 (-1.68--0.13) |
| Seychelles | |  | 12.36 (0.00*-63.18) | 13.84 (-0.00*-69.63) | 11.92 (-88.39-32.85) | |  | | 22.14 (0.00*-112.86) | | 11.35 (-0.00*-57.09) | -48.73 (-95.77--39.38) |  | -2.04 (-2.18--1.90) | -1.82 (-4.48-0.92) |
| Uganda | |  | 1271.31 (0.00*-6468.78) | 1961.48 (0.00*-10169.68) | 54.29 (-91.42-102.49) | |  | | 18.41 (0.00*-93.72) | | 11.95 (0.00*-61.49) | -35.08 (-95.86--15.12) |  | -2.13 (-2.47--1.79) | -1.76 (-2.16--1.36) |
| United Republic of Tanzania | |  | 2294.88 (0.00*-11354.60) | 3414.05 (0.00*-17274.35) | 48.77 (-87.23-97.53) | |  | | 19.44 (0.00*-95.70) | | 12.12 (0.00*-60.89) | -37.64 (-92.53--16.30) |  | -1.74 (-1.84--1.65) | -1.57 (-1.9--1.23) |
| Zambia | |  | 696.95 (0.00*-3609.45) | 1166.51 (0.00*-6405.51) | 67.37 (-98.89-123.84) | |  | | 21.80 (0.00*-112.43) | | 14.42 (0.00*-77.58) | -33.85 (-98.96--13.67) |  | -1.85 (-2.14--1.56) | -1.51 (-2.18--0.83) |
| Lesotho | |  | 140.35 (0.00*-775.77) | 261.60 (-0.00*-1461.84) | 86.39 (-80.64-249.52) | |  | | 15.89 (0.00*-88.16) | | 21.79 (0.00*-122.95) | 37.10 (-83.82-167.48) |  | 1.76 (1.27-2.26) | 1.68 (0.63-2.74) |
| Botswana | |  | 112.80 (0.00*-641.02) | 142.40 (-0.00*-796.10) | 26.24 (-97.28-112.26) | |  | | 18.35 (0.00*-104.67) | | 8.62 (0.00*-48.60) | -53.01 (-93.23--20.80) |  | -2.58 (-2.83--2.32) | -2.31 (-3.89--0.7) |
| South Africa | |  | 3160.98 (0.00*-17148.60) | 4637.66 (0.00*-25751.95) | 46.72 (-113.19-71.36) | |  | | 13.44 (0.00*-73.49) | | 9.27 (0.00*-51.66) | -30.98 (-103.35--20.33) |  | -1.40 (-1.70--1.10) | -1.27 (-1.54--0.99) |
| Namibia | |  | 44.82 (0.00*-240.88) | 72.49 (-0.00*-395.93) | 61.75 (-89.30-181.65) | |  | | 6.22 (0.00*-33.55) | | 4.58 (-0.00*-25.00) | -26.27 (-92.88-18.35) |  | -1.21 (-1.57--0.85) | -1.01 (-3.49-1.53) |
| Eswatini | |  | 63.67 (-0.00*-355.80) | 109.57 (-0.00*-620.89) | 72.09 (-166.46-202.67) | |  | | 19.66 (-0.00*-111.25) | | 16.45 (-0.00*-93.58) | -16.35 (-126.38-37.33) |  | -0.12 (-0.77-0.54) | 0.01 (-1.91-1.96) |
| Zimbabwe | |  | 908.77 (0.00*-4835.60) | 2115.97 (0.00*-11467.20) | 132.84 (-52.05-348.12) | |  | | 20.87 (0.00*-110.33) | | 26.08 (0.00*-140.73) | 24.97 (-66.86-138.14) |  | 1.38 (0.78-1.98) | 1.34 (0.91-1.77) |
| Benin | |  | 467.97 (0.00*-2485.41) | 918.36 (0.00*-4782.00) | 96.24 (-114.30-344.60) | |  | | 22.57 (0.00*-119.19) | | 16.67 (0.00*-86.71) | -26.15 (-105.74-83.83) |  | -0.75 (-0.92--0.57) | -0.76 (-1.21--0.3) |
| Burkina Faso | |  | 1120.00* (0.00*-6133.64) | 1968.31 (0.00*-11098.15) | 75.74 (-68.14-777.00) | |  | | 24.67 (0.00*-134.44) | | 20.06 (0.00*-112.79) | -18.71 (-77.04-302.19) |  | -0.36 (-0.56--0.16) | -0.42 (-0.84-0) |
| Cabo Verde | |  | 117.76 (0.00*-622.10) | 169.91 (-0.00*-922.31) | 44.29 (-119.79-551.64) | |  | | 52.51 (0.00*-276.31) | | 37.72 (-0.00*-205.61) | -28.17 (-113.33-206.96) |  | -1.29 (-1.74--0.83) | -1.59 (-2.34--0.82) |
| Cameroon | |  | 1053.61 (0.00*-5691.63) | 2438.45 (0.00*-13966.93) | 131.44 (-119.68-828.65) | |  | | 22.07 (0.00*-118.96) | | 17.73 (-0.00*-100.65) | -19.66 (-109.21-212.17) |  | -0.51 (-0.65--0.36) | -0.48 (-0.85--0.11) |
| Côte d'Ivoire | |  | 374.28 (0.00*-1936.17) | 787.35 (-0.00*-4235.35) | 110.36 (-161.58-481.40) | |  | | 8.23 (0.00*-42.67) | | 6.17 (0.00*-32.87) | -25.07 (-115.96-93.03) |  | -0.88 (-1.07--0.68) | -0.64 (-1.42-0.14) |
| Chad | |  | 605.68 (0.00*-3271.74) | 1472.66 (0.00*-8136.27) | 143.14 (-50.64-920.77) | |  | | 20.84 (0.00*-112.96) | | 23.57 (0.00*-130.09) | 13.13 (-73.28-398.18) |  | 0.61 (0.47-0.74) | 0.59 (0.12-1.05) |
| Ghana | |  | 1187.93 (0.00*-6358.78) | 2465.08 (-0.00*-12776.36) | 107.51 (-114.28-1419.06) | |  | | 17.48 (0.00*-92.91) | | 13.81 (0.00*-71.20) | -21.00 (-122.90-490.43) |  | -0.55 (-0.61--0.49) | -0.62 (-0.97--0.28) |
| Gambia | |  | 29.00 (0.00*-160.69) | 66.54 (0.00*-355.84) | 129.46 (-95.24-658.89) | |  | | 7.48 (0.00*-41.06) | | 6.22 (0.00*-33.07) | -16.85 (-101.03-170.38) |  | -0.66 (-0.82--0.49) | -0.6 (-3.56-2.45) |
| Guinea | |  | 682.28 (0.00*-3624.44) | 1073.61 (0.00*-5838.00) | 57.36 (-110.89-539.75) | |  | | 19.73 (-0.00*-105.27) | | 17.44 (0.00*-94.45) | -11.59 (-111.00-273.47) |  | -0.18 (-0.34--0.03) | -0.13 (-0.56-0.3) |
| Guinea-Bissau | |  | 159.96 (0.00*-897.51) | 239.18 (0.00*-1304.10) | 49.53 (-84.40-462.10) | |  | | 36.56 (-0.00*-203.01) | | 28.79 (-0.00*-155.74) | -21.24 (-90.77-211.85) |  | -0.39 (-0.55--0.22) | -0.36 (-2.03-1.33) |
| Mali | |  | 1790.67 (0.00*-9508.04) | 2972.59 (0.00*-15640.41) | 66.00 (-95.75-567.26) | |  | | 41.04 (0.00*-219.42) | | 30.42 (0.00*-159.74) | -25.89 (-98.98-197.71) |  | -0.73 (-0.85--0.62) | -0.72 (-1.09--0.35) |
| Liberia | |  | 233.88 (0.00*-1279.56) | 407.53 (0.00*-2248.71) | 74.25 (-84.35-721.75) | |  | | 19.57 (0.00*-106.49) | | 17.25 (0.00*-95.14) | -11.83 (-90.89-277.08) |  | -0.33 (-0.51--0.15) | -0.28 (-1.06-0.5) |
| Mauritania | |  | 222.70 (0.00*-1199.22) | 325.67 (0.00*-1762.36) | 46.24 (-80.28-462.97) | |  | | 21.58 (0.00*-115.65) | | 14.69 (0.00*-79.36) | -31.90 (-90.88-149.88) |  | -1.10 (-1.37--0.84) | -1.22 (-2.08--0.36) |
| Nigeria | |  | 2934.12 (0.00*-15756.73) | 4072.46 (0.00*-22551.03) | 38.80 (-54.39-198.09) | |  | | 6.24 (0.00*-33.69) | | 4.11 (0.00*-22.85) | -34.22 (-76.62-43.17) |  | -1.34 (-1.45--1.22) | -1.14 (-1.36--0.93) |
| Niger | |  | 717.96 (0.00*-3877.54) | 1673.82 (0.00*-9215.06) | 133.14 (-65.66-1160.04) | |  | | 23.55 (0.00*-126.82) | | 19.28 (0.00*-105.25) | -18.12 (-83.62-302.23) |  | -0.33 (-0.51--0.15) | -0.4 (-1.01-0.21) |
| Senegal | |  | 744.70 (0.00*-4014.97) | 1442.80 (0.00*-8003.64) | 93.74 (-94.12-614.12) | |  | | 21.85 (0.00*-117.75) | | 17.81 (0.00*-98.07) | -18.50 (-100.03-231.44) |  | -0.37 (-0.61--0.13) | -0.47 (-0.91--0.02) |
| Togo | |  | 289.39 (-0.00*-1560.60) | 852.55 (0.00*-4937.10) | 194.60 (-58.21-1422.13) | |  | | 21.31 (0.00*-114.32) | | 20.31 (0.00*-115.37) | -4.71 (-72.26-374.04) |  | 0.16 (-0.00*-0.32) | 0.09 (-0.65-0.85) |
| Sao Tome and Principe | |  | 17.63 (0.00*-93.00) | 27.36 (0.00*-139.85) | 55.16 (-111.34-778.53) | |  | | 27.16 (0.00*-143.37) | | 24.09 (0.00*-124.39) | -11.29 (-104.36-376.32) |  | -0.44 (-0.63--0.25) | -0.47 (-2.63-1.74) |
| Sierra Leone | |  | 419.36 (-0.00*-2318.90) | 727.73 (-0.00*-4055.91) | 73.53 (-90.44-606.54) | |  | | 19.86 (-0.00*-109.52) | | 17.95 (-0.00*-99.25) | -9.63 (-91.36-277.11) |  | 0.15 (-0.06-0.36) | 0.12 (-0.41-0.65) |
| Bermuda | |  | 14.12 (-0.00*-73.77) | 10.33 (-0.00*-55.77) | -26.85 (-98.16-53.90) | |  | | 22.38 (-0.00*-116.93) | | 7.89 (-0.00*-42.51) | -64.72 (-98.19--32.75) |  | -3.23 (-3.47--2.98) | -3.23 (-6.21--0.16) |
| American Samoa | |  | 8.37 (0.00*-48.22) | 13.63 (-0.00*-75.33) | 62.91 (-104.53-1297.94) | |  | | 33.50 (0.00*-190.16) | | 28.69 (-0.00*-156.55) | -14.36 (-82.90-325.89) |  | -0.43 (-0.52--0.34) | -0.41 (-3.81-3.11) |
| Greenland | |  | 16.20 (0.00*-82.61) | 12.42 (-0.00*-64.06) | -23.32 (-132.32-185.20) | |  | | 40.00* (0.00*-203.64) | | 17.00 (-0.00*-87.85) | -57.48 (-109.83-104.32) |  | -2.75 (-2.87--2.62) | -2.63 (-7.9-2.93) |
| Cook Islands | |  | 2.63 (0.00*-13.82) | 2.76 (0.00*-14.08) | 5.12 (-116.92-65.51) | |  | | 20.67 (0.00*-107.53) | | 11.12 (0.00*-57.42) | -46.21 (-105.58--28.15) |  | -1.91 (-2.09--1.74) | -1.76 (-7.4-4.22) |
| Monaco | |  | 12.51 (-0.00*-65.14) | 10.04 (-0.00*-53.39) | -19.77 (-92.10-206.69) | |  | | 19.69 (-0.00*-102.73) | | 11.58 (-0.00*-60.31) | -41.20 (-103.37-182.77) |  | -1.71 (-1.83--1.58) | -1.65 (-4.56-1.36) |
| Guam | |  | 12.29 (-0.00*-64.90) | 21.56 (-0.00*-113.23) | 75.39 (-103.50-156.21) | |  | | 15.67 (0.00*-80.55) | | 10.64 (-0.00*-56.35) | -32.09 (-90.42--21.00) |  | -0.85 (-1.24--0.46) | -1.27 (-4.69-2.28) |
| Niue | |  | 0.57 (-0.00*-2.87) | 0.44 (0.00*-2.25) | -22.70 (-92.42-6.80) | |  | | 26.61 (-0.00*-133.54) | | 20.96 (0.00*-106.92) | -21.25 (-85.42-8.94) |  | -1.01 (-1.08--0.94) | -0.88 (-12.15-11.83) |
| Nauru | |  | 2.70 (-0.00*-14.51) | 2.78 (-0.00*-15.22) | 2.92 (-84.21-55.84) | |  | | 51.40 (-0.00*-269.18) | | 41.59 (-0.00*-217.06) | -19.10 (-85.61-14.94) |  | -0.79 (-1.08--0.50) | -0.62 (-13.05-13.6) |
| Palau | |  | 4.73 (-0.00*-25.72) | 7.95 (0.00*-41.98) | 67.95 (-147.31-145.26) | |  | | 45.69 (-0.00*-245.01) | | 35.00 (0.00*-183.43) | -23.40 (-123.79-1.45) |  | -0.74 (-0.80--0.68) | -0.67 (-5.24-4.11) |
| Northern Mariana Islands | |  | 6.45 (-0.00*-35.48) | 12.73 (-0.00*-64.41) | 97.41 (-87.14-395.10) | |  | | 30.52 (0.00*-162.34) | | 24.14 (0.00*-123.29) | -20.89 (-108.71-9.30) |  | -0.66 (-0.95--0.37) | -0.74 (-5.8-4.58) |
| Saint Kitts and Nevis | |  | 10.89 (-0.00*-55.82) | 10.51 (0.00*-58.47) | -3.49 (-92.99-65.58) | |  | | 30.25 (-0.00*-155.63) | | 14.90 (-0.00*-82.49) | -50.73 (-96.87--12.49) |  | -2.05 (-2.26--1.84) | -2.42 (-5.83-1.1) |
| Puerto Rico | |  | 721.42 (0.00*-3732.70) | 470.19 (-0.00*-2477.25) | -34.83 (-105.54-1.38) | |  | | 19.94 (-0.00*-103.16) | | 7.39 (-0.00*-39.46) | -62.95 (-105.30--49.23) |  | -3.46 (-3.61--3.31) | -3.33 (-3.7--2.97) |
| San Marino | |  | 14.36 (0.00*-74.34) | 10.46 (0.00*-58.57) | -27.15 (-81.84-100.25) | |  | | 41.88 (0.00*-218.39) | | 14.90 (0.00*-83.83) | -64.41 (-88.67-9.31) |  | -2.55 (-2.86--2.25) | -2.38 (-4.92-0.23) |
| Tuvalu | |  | 3.07 (-0.00*-16.90) | 3.04 (-0.00*-16.17) | -0.83 (-106.21-48.06) | |  | | 43.29 (-0.00*-237.51) | | 28.45 (0.00*-151.15) | -34.28 (-109.62--9.97) |  | -1.27 (-1.36--1.18) | -1.16 (-9.02-7.39) |
| Tokelau | |  | 0.43 (-0.00*-2.36) | 0.29 (-0.00*-1.50) | -32.60 (-98.11--2.17) | |  | | 32.03 (0.00*-175.75) | | 19.87 (-0.00*-102.66) | -37.96 (-100.81--12.50) |  | -1.68 (-1.72--1.64) | -1.49 (-15.91-15.4) |
| South Sudan | |  | 614.99 (0.00*-3225.42) | 809.73 (-0.00*-4325.36) | 31.67 (-100.31-77.07) | |  | | 22.53 (0.00*-117.50) | | 18.49 (0.00*-97.00) | -17.96 (-100.41-10.62) |  | -0.91 (-1.13--0.69) | -0.75 (-1.35--0.14) |
| Sudan | |  | 3034.57 (-0.00*-17978.01) | 4404.26 (-0.00*-27599.61) | 45.14 (-97.75-558.71) | |  | | 29.18 (-0.00*-174.63) | | 19.54 (-0.00*-123.65) | -33.01 (-98.04-226.69) |  | -1.36 (-1.41--1.30) | -1.17 (-1.46--0.88) |
| United States Virgin Islands | |  | 18.55 (-0.00*-97.99) | 15.86 (-0.00*-82.89) | -14.51 (-118.44-95.77) | |  | | 20.88 (0.00*-109.62) | | 9.82 (-0.00*-51.14) | -52.97 (-99.26--15.73) |  | -2.28 (-2.46--2.11) | -1.96 (-4.58-0.73) |
|  |  |  |  |  |  | |  |  | | |  |  |  |

ASDR, Age-standardized Disability-Adjusted Life Years rate; EAPC, estimated annual percentage changes; Net drift , overall annual percentage change; SDI, Socio-demographic Index; UI, uncertainty interval; CI, confidence interval.

When the sample size was small, the lower limit of the 95% uncertainty interval (UI) appeared as '0.00'. We marked this with an asterisk '*', indicating that the lower limit is very small, but the actual value is not zero.
