# Supplementary material for: High Sodium Intake: A Silent Killer Driving Global Gastric Cancer Burden
Source: Research Square preprint supplement (doi:10.21203/rs.3.rs-5037516/v1), 2025-07-15
Supplement: Supplementary file 2 [file 5f69bf63e8e9bd9f7672399c.xlsx]

## Sheet: Sheet1
Table S6. The number of stomach cancer DALYs related to high sodium intake from 1990 to 2021, and projected DALYs cases for 2022 to 2035 based on the BAPC model.
	val	sd	Time	low_95	up_95
1	2.38171e+06	2350.23	1990	2.3771e+06	2.38631e+06
2	2.36333e+06	2333.67	1991	2.35875e+06	2.3679e+06
3	2.34974e+06	2321.49	1992	2.34519e+06	2.35429e+06
4	2.33362e+06	2308.41	1993	2.3291e+06	2.33815e+06
5	2.31279e+06	2292.93	1994	2.3083e+06	2.31729e+06
6	2.28634e+06	2274.99	1995	2.28188e+06	2.2908e+06
7	2.24962e+06	2251.52	1996	2.24521e+06	2.25403e+06
8	2.21347e+06	2227.67	1997	2.20911e+06	2.21784e+06
9	2.19779e+06	2214.14	1998	2.19345e+06	2.20213e+06
10	2.19754e+06	2207.87	1999	2.19321e+06	2.20186e+06
11	2.18637e+06	2196.52	2000	2.18207e+06	2.19068e+06
12	2.18658e+06	2190.37	2001	2.18228e+06	2.19087e+06
13	2.17478e+06	2177.71	2002	2.17051e+06	2.17905e+06
14	2.17222e+06	2170.16	2003	2.16797e+06	2.17647e+06
15	2.17136e+06	2163.05	2004	2.16712e+06	2.1756e+06
16	2.12526e+06	2133.2	2005	2.12108e+06	2.12944e+06
17	2.03541e+06	2080.21	2006	2.03133e+06	2.03949e+06
18	1.98084e+06	2044.79	2007	1.97683e+06	1.98485e+06
19	1.95639e+06	2025.4	2008	1.95242e+06	1.96036e+06
20	1.92469e+06	2002.32	2009	1.92077e+06	1.92862e+06
21	1.90085e+06	1983.12	2010	1.89696e+06	1.90474e+06
22	1.8548e+06	1951.59	2011	1.85097e+06	1.85862e+06
23	1.82426e+06	1927.71	2012	1.82048e+06	1.82803e+06
24	1.7868e+06	1900.68	2013	1.78308e+06	1.79053e+06
25	1.75029e+06	1874.18	2014	1.74662e+06	1.75397e+06
26	1.72177e+06	1852.27	2015	1.71814e+06	1.72541e+06
27	1.71739e+06	1843.31	2016	1.71378e+06	1.72101e+06
28	1.69242e+06	1823.18	2017	1.68884e+06	1.69599e+06
29	1.68336e+06	1811.58	2018	1.67981e+06	1.68691e+06
30	1.6729e+06	1799.21	2019	1.66938e+06	1.67643e+06
31	1.65584e+06	1784.02	2020	1.65234e+06	1.65934e+06
32	1.6464e+06	1774.7	2021	1.64292e+06	1.64988e+06
33	1.62289e+06	21999.2	2022	1.57977e+06	1.66601e+06
34	1.59172e+06	27187.3	2023	1.53844e+06	1.64501e+06
35	1.5602e+06	31394	2024	1.49867e+06	1.62173e+06
36	1.52818e+06	34976.3	2025	1.45962e+06	1.59673e+06
37	1.49663e+06	38150.4	2026	1.42186e+06	1.57141e+06
38	1.46552e+06	41034.9	2027	1.38509e+06	1.54594e+06
39	1.43464e+06	43609.7	2028	1.34916e+06	1.52011e+06
40	1.4035e+06	45900.6	2029	1.31353e+06	1.49346e+06
41	1.37199e+06	47952	2030	1.278e+06	1.46598e+06
42	1.34113e+06	49844.1	2031	1.24343e+06	1.43882e+06
43	1.31109e+06	51628.7	2032	1.2099e+06	1.41229e+06
44	1.28162e+06	53264.2	2033	1.17723e+06	1.38602e+06
45	1.25213e+06	54741.3	2034	1.14484e+06	1.35943e+06
46	1.2224e+06	56074.3	2035	1.11249e+06	1.3323e+06
DALYs,Disability-Adjusted Life Years; Number,the number of stomach cancer DALYs related to high sodium intake;low and up,uncertainty interval.
