# Supplementary material for: High Sodium Intake: A Silent Killer Driving Global Gastric Cancer Burden
Source: Research Square preprint supplement (doi:10.21203/rs.3.rs-5037516/v1), 2025-07-15
Supplement: Supplementary file 3 [file c3c06c49b2f51a8893b1e27a.xlsx]

## Sheet: Sheet1
Table S3. ASMR of stomach cancer related to high sodium intake from 1990 to 2021 and projected ASMR for 2022 to 2035 based on the BAPC model.
	val	sd	Time	low_95	up_95
1	1.74988	0.006495	1990	1.73715	1.76261
2	1.7146	0.00611859	1991	1.70261	1.72659
3	1.68319	0.00597771	1992	1.67147	1.69491
4	1.65223	0.00585341	1993	1.64076	1.66371
5	1.61974	0.00573024	1994	1.60851	1.63097
6	1.58518	0.00560703	1995	1.57419	1.59617
7	1.54538	0.00547485	1996	1.53465	1.55611
8	1.50771	0.00534817	1997	1.49723	1.51819
9	1.48274	0.00524616	1998	1.47246	1.49303
10	1.46579	0.0051601	1999	1.45567	1.4759
11	1.44643	0.00506993	2000	1.4365	1.45637
12	1.43203	0.00498948	2001	1.42225	1.44181
13	1.41168	0.00489766	2002	1.40208	1.42128
14	1.3986	0.00482227	2003	1.38915	1.40805
15	1.38271	0.00474473	2004	1.37341	1.39201
16	1.33959	0.00460792	2005	1.33056	1.34862
17	1.27076	0.00442032	2006	1.2621	1.27943
18	1.22365	0.00427578	2007	1.21527	1.23203
19	1.19576	0.00416394	2008	1.18759	1.20392
20	1.16776	0.00406153	2009	1.1598	1.17572
21	1.1422	0.00396628	2010	1.13443	1.14998
22	1.10517	0.00384471	2011	1.09763	1.1127
23	1.07415	0.00373441	2012	1.06683	1.08147
24	1.04307	0.00362552	2013	1.03596	1.05018
25	1.01284	0.00352027	2014	1.00594	1.01974
26	0.986815	0.00342752	2015	0.980097	0.993533
27	0.972354	0.00335686	2016	0.965774	0.978933
28	0.949903	0.00327225	2017	0.943489	0.956316
29	0.935096	0.00320082	2018	0.928822	0.94137
30	0.920833	0.00313228	2019	0.914694	0.926972
31	0.904763	0.00307008	2020	0.898746	0.910781
32	0.892028	0.00311798	2021	0.885916	0.898139
33	0.864115	0.0108364	2022	0.842876	0.885355
34	0.839741	0.0139371	2023	0.812425	0.867058
35	0.815872	0.0162962	2024	0.783931	0.847812
36	0.792494	0.0182194	2025	0.756784	0.828204
37	0.769822	0.0198628	2026	0.730891	0.808753
38	0.747544	0.021309	2027	0.705778	0.789309
39	0.725707	0.0225483	2028	0.681512	0.769902
40	0.704326	0.0236103	2029	0.65805	0.750602
41	0.683549	0.0245359	2030	0.635459	0.73164
42	0.663604	0.0253663	2031	0.613886	0.713322
43	0.644178	0.02612	2032	0.592982	0.695373
44	0.62516	0.0267702	2033	0.572691	0.67763
45	0.606551	0.0273251	2034	0.552994	0.660109
46	0.588537	0.02781	2035	0.534029	0.643044
ASMR, Age-standardized mortality rate;ASR, Age-standardized rate;low and up,uncertainty interval.
