# Supplementary material for: High Sodium Intake: A Silent Killer Driving Global Gastric Cancer Burden
Source: Research Square preprint supplement (doi:10.21203/rs.3.rs-5037516/v1), 2025-07-15
Supplement: Supplementary file 4 [file d7a8a41a21695a2f62d4702c.xlsx]

## Sheet: Sheet1
Table S5. The number of stomach cancer deaths related to high sodium intake from 1990 to 2021, and projected death cases for 2022 to 2035 based on the BAPC model.
	val	sd	Time	low_95	up_95
1	93331.8	461.885	1990	92426.5	94237.1
2	92871.4	450.23	1991	91989	93753.9
3	92528.5	447.785	1992	91650.8	93406.2
4	92119.7	445.676	1993	91246.2	92993.3
5	91522.7	443.124	1994	90654.2	92391.3
6	90736.5	440.165	1995	89873.8	91599.2
7	89607.4	436.33	1996	88752.2	90462.6
8	88548.9	432.677	1997	87700.9	89397
9	88191.9	430.765	1998	87347.6	89036.2
10	88282.7	429.967	1999	87440	89125.5
11	88214.8	428.744	2000	87374.5	89055.2
12	88445	428.261	2001	87605.6	89284.4
13	88306.2	426.81	2002	87469.6	89142.7
14	88617.2	426.585	2003	87781.1	89453.3
15	88747.6	426.015	2004	87912.6	89582.6
16	87104.8	420.57	2005	86280.4	87929.1
17	83727	410.547	2006	82922.3	84531.7
18	81708	404.01	2007	80916.2	82499.9
19	80935.2	400.46	2008	80150.3	81720.1
20	80120.9	397.209	2009	79342.4	80899.5
21	79391.9	394.201	2010	78619.2	80164.5
22	77779.9	388.582	2011	77018.3	78541.5
23	76547.8	383.889	2012	75795.4	77300.2
24	75270.3	379.102	2013	74527.2	76013.3
25	73999.5	374.365	2014	73265.8	74733.3
26	72988.9	370.483	2015	72262.7	73715
27	72796.4	368.722	2016	72073.7	73519
28	71960.4	365.254	2017	71244.5	72676.3
29	71647.3	363.034	2018	70935.8	72358.8
30	71321.5	360.803	2019	70614.3	72028.7
31	70773.9	358.395	2020	70071.4	71476.3
32	70393.1	361.848	2021	69683.8	71102.3
33	69521.3	910.824	2022	67736.1	71306.5
34	68210.5	1161.82	2023	65933.3	70487.7
35	66891.3	1360.89	2024	64224	69558.7
36	65563.7	1528.9	2025	62567	68560.3
37	64247	1676.96	2026	60960.1	67533.8
38	62917.6	1810.95	2027	59368.1	66467
39	61582	1929.43	2028	57800.3	65363.7
40	60243.2	2034.32	2029	56256	64230.5
41	58915.5	2128.65	2030	54743.4	63087.7
42	57621	2215.61	2031	53278.4	61963.6
43	56335	2296.56	2032	51833.7	60836.2
44	55049.6	2368.95	2033	50406.5	59692.7
45	53766.8	2433.26	2034	48997.6	58536
46	52504.8	2491.56	2035	47621.4	57388.3
Number,the number of stomach cancer deaths related to high sodium intake;low and up,uncertainty interval.
