# Supplementary material for: High Sodium Intake: A Silent Killer Driving Global Gastric Cancer Burden
Source: Research Square preprint supplement (doi:10.21203/rs.3.rs-5037516/v1), 2025-07-15
Supplement: Supplementary file 5 [file e45236bbf8a47006b2e1d34a.xlsx]

## Sheet: Sheet1
Table S4. ASDR of stomach cancer related to high sodium intake from 1990 to 2021 and projected ASDR for 2022 to 2035 based on the BAPC model.
	val	sd	Time	low_95	up_95
1	44.6546	0.0332332	1990	44.5894	44.7197
2	43.6319	0.032415	1991	43.5683	43.6954
3	42.7442	0.0317149	1992	42.682	42.8063
4	41.8552	0.0310403	1993	41.7943	41.916
5	40.931	0.0303697	1994	40.8715	40.9906
6	39.9427	0.0296952	1995	39.8845	40.0009
7	38.7973	0.0289597	1996	38.7405	38.854
8	37.6885	0.028231	1997	37.6331	37.7438
9	36.9509	0.0276498	1998	36.8967	37.0051
10	36.4864	0.0271664	1999	36.4332	36.5397
11	35.8494	0.0266332	2000	35.7972	35.9016
12	35.4033	0.0261634	2001	35.352	35.4546
13	34.7666	0.025616	2002	34.7164	34.8168
14	34.2831	0.0251402	2003	34.2339	34.3324
15	33.8304	0.024671	2004	33.782	33.8788
16	32.6845	0.0239502	2005	32.6375	32.7314
17	30.8924	0.0229769	2006	30.8473	30.9374
18	29.6649	0.0222146	2007	29.6214	29.7084
19	28.9042	0.0216423	2008	28.8618	28.9466
20	28.0524	0.0210435	2009	28.0111	28.0936
21	27.3474	0.0205079	2010	27.3072	27.3876
22	26.3546	0.0198616	2011	26.3157	26.3935
23	25.5988	0.0193008	2012	25.561	25.6366
24	24.761	0.0187247	2013	24.7243	24.7977
25	23.9565	0.0181696	2014	23.9209	23.9922
26	23.2785	0.0176752	2015	23.2439	23.3132
27	22.9395	0.0173149	2016	22.9056	22.9735
28	22.3405	0.0168613	2017	22.3074	22.3735
29	21.9701	0.0165009	2018	21.9378	22.0025
30	21.5989	0.0161478	2019	21.5672	21.6305
31	21.168	0.0157966	2020	21.1371	21.199
32	20.8633	0.0155364	2021	20.8329	20.8938
33	20.1717	0.27298	2022	19.6367	20.7068
34	19.5958	0.334343	2023	18.9405	20.2511
35	19.0297	0.382608	2024	18.2798	19.7796
36	18.4717	0.422508	2025	17.6435	19.2998
37	17.933	0.456892	2026	17.0375	18.8285
38	17.4123	0.487337	2027	16.4571	18.3674
39	16.9063	0.51372	2028	15.8994	17.9132
40	16.4088	0.536462	2029	15.3574	17.4603
41	15.9181	0.556182	2030	14.828	17.0082
42	15.4453	0.573884	2031	14.3205	16.5702
43	14.9921	0.590217	2032	13.8352	16.1489
44	14.5545	0.604748	2033	13.3692	15.7398
45	14.1255	0.617416	2034	12.9154	15.3356
46	13.7021	0.628426	2035	12.4704	14.9338
ASDR, Age-standardized Disability-Adjusted Life Years rate;ASR, Age-standardized rate;low and up,uncertainty interval.
