# Supplementary material for: High Sodium Intake: A Silent Killer Driving Global Gastric Cancer Burden
Source: Research Square preprint supplement (doi:10.21203/rs.3.rs-5037516/v1), 2025-07-15
Supplement: Supplementary file 6 [file e9f96c62dd90e87ab52e4cc0.docx]

**Table S1** Trends in stomach cancer mortality related to high sodium intake across 204 countries from 1990 to 2021.

|  |  | |  |  | |  | | |  | | | |  |  | |  | | |  |  | | |
| --- | --- | --- | --- | --- | --- | --- | --- | --- | --- | --- | --- | --- | --- | --- | --- | --- | --- | --- | --- | --- | --- | --- |
|  | |  | Deaths | | | | |  | | | ASMR | | | | | |  | Trend | | | |
| Characteristics | |  | 1990 (95%UI) | | 2021 (95%UI) | | Changes of number (%) | | |  | 1990 (95%UI) | 2021 (95%UI) | | | Percent of change (%) | |  | EAPC (95%CI) | | | Net drift (95%CI) |
| Cambodia | |  | 61.89 (-0.00*-327.47) | | 101.09 (0.00*-501.79) | | 63.35 (-101.43-120.90) | | |  | 1.39 (0.00*-7.28) | 0.86 (0.00*-4.27) | | | -38.03 (-92.36--18.34) | |  | -1.69 (-1.79--1.59) | | | -1.76 (-3.05--0.44) |
| Democratic People's Republic of Korea | |  | 366.64 (-0.00*-1838.87) | | 594.16 (-0.00*-3058.40) | | 62.06 (-14.22-120.94) | | |  | 2.30 (-0.00*-11.52) | 1.80 (-0.00*-9.26) | | | -22.04 (-76.30-5.00) | |  | -0.79 (-0.91--0.66) | | | -0.73 (-1.24--0.22) |
| Taiwan (Province of China) | |  | 240.76 (0.00*-1210.79) | | 309.97 (0.00*-1568.56) | | 28.75 (-77.47-66.55) | | |  | 1.59 (0.00*-7.97) | 0.72 (0.00*-3.66) | | | -54.63 (-96.54--46.86) | |  | -3.00 (-3.23--2.76) | | | -2.95 (-3.61--2.29) |
| China | |  | 31208.21 (-0.00*-152475.63) | | 36957.67 (-0.00*-183972.30) | | 18.42 (-74.69-48.26) | | |  | 3.85 (-0.00*-18.79) | 1.78 (-0.00*-8.81) | | | -53.66 (-88.68--41.77) | |  | -2.56 (-2.78--2.34) | | | -2.62 (-2.72--2.52) |
| Indonesia | |  | 765.13 (-0.00*-3955.21) | | 1352.86 (0.00*-6847.82) | | 76.82 (-89.86-129.51) | | |  | 0.80 (0.00*-4.08) | 0.61 (0.00*-3.11) | | | -22.71 (-87.31-0.11) | |  | -0.78 (-0.86--0.71) | | | -0.95 (-1.27--0.62) |
| Philippines | |  | 131.54 (0.00*-662.82) | | 289.05 (0.00*-1485.59) | | 119.74 (-56.45-166.78) | | |  | 0.47 (0.00*-2.34) | 0.36 (0.00*-1.86) | | | -22.22 (-81.01--3.88) | |  | -0.64 (-0.73--0.54) | | | -0.86 (-1.77-0.06) |
| Lao People's Democratic Republic | |  | 29.83 (0.00*-154.53) | | 31.09 (0.00*-158.17) | | 4.24 (-84.30-43.95) | | |  | 1.44 (0.00*-7.51) | 0.71 (0.00*-3.57) | | | -51.01 (-94.43--33.45) | |  | -2.49 (-2.57--2.40) | | | -2.49 (-4.8--0.11) |
| Sri Lanka | |  | 73.86 (-0.00*-360.40) | | 77.86 (0.00*-406.55) | | 5.41 (-75.64-46.44) | | |  | 0.73 (-0.00*-3.59) | 0.29 (0.00*-1.54) | | | -59.78 (-90.54--44.85) | |  | -3.03 (-3.24--2.81) | | | -3 (-4.12--1.87) |
| Maldives | |  | 0.68 (-0.00*-3.47) | | 0.73 (0.00*-3.77) | | 7.92 (-106.87-41.33) | | |  | 0.80 (-0.00*-4.05) | 0.23 (0.00*-1.18) | | | -70.90 (-100.07--61.91) | |  | -4.37 (-4.60--4.13) | | | -4.58 (-17.3-10.1) |
| Myanmar | |  | 300.61 (-0.00*-1562.09) | | 284.72 (0.00*-1417.16) | | -5.28 (-106.29-32.52) | | |  | 1.31 (-0.00*-6.84) | 0.61 (0.00*-3.02) | | | -53.30 (-103.84--35.35) | |  | -2.83 (-2.96--2.69) | | | -2.82 (-3.44--2.19) |
| Malaysia | |  | 66.37 (0.00*-329.25) | | 141.02 (0.00*-713.21) | | 112.48 (-78.94-144.62) | | |  | 0.74 (0.00*-3.66) | 0.53 (0.00*-2.67) | | | -29.15 (-91.42--18.47) | |  | -1.29 (-1.43--1.15) | | | -1.03 (-2.01--0.04) |
| Thailand | |  | 327.99 (-0.00*-1636.80) | | 637.54 (0.00*-3388.31) | | 94.38 (-97.80-160.67) | | |  | 0.95 (0.00*-4.72) | 0.60 (0.00*-3.18) | | | -37.00 (-100.19--17.11) | |  | -1.87 (-2.03--1.71) | | | -1.64 (-2.06--1.21) |
| Timor-Leste | |  | 2.38 (-0.00*-12.44) | | 5.23 (0.00*-26.86) | | 119.57 (-36.07-212.45) | | |  | 0.88 (-0.00*-4.64) | 0.64 (0.00*-3.31) | | | -27.28 (-87.62-4.62) | |  | -0.93 (-1.17--0.68) | | | -1.19 (-6.52-4.45) |
| Viet Nam | |  | 490.47 (0.00*-2475.18) | | 630.08 (0.00*-3105.65) | | 28.47 (-117.77-75.66) | | |  | 1.23 (0.00*-6.16) | 0.64 (0.00*-3.15) | | | -47.69 (-112.63--29.38) | |  | -2.49 (-2.70--2.28) | | | -2.18 (-2.59--1.77) |
| Kiribati | |  | 0.65 (-0.00*-3.42) | | 1.13 (-0.00*-5.92) | | 74.07 (-79.50-152.65) | | |  | 1.89 (0.00*-9.73) | 1.73 (0.00*-8.99) | | | -8.60 (-94.30-27.92) | |  | -0.29 (-0.35--0.23) | | | -0.18 (-10.57-11.41) |
| Fiji | |  | 2.56 (-0.00*-14.33) | | 4.27 (0.00*-22.90) | | 66.52 (-100.50-183.47) | | |  | 0.81 (0.00*-4.40) | 0.65 (0.00*-3.47) | | | -19.72 (-105.17-15.33) | |  | -0.78 (-0.95--0.60) | | | -0.76 (-5.75-4.5) |
| Samoa | |  | 0.56 (-0.00*-3.36) | | 0.85 (0.00*-4.98) | | 50.14 (-893.89-1657.58) | | |  | 0.75 (-0.00*-4.36) | 0.65 (0.00*-3.77) | | | -13.60 (-483.21-738.76) | |  | -0.54 (-0.63--0.45) | | | -0.35 (-11.56-12.3) |
| Solomon Islands | |  | 2.37 (-0.00*-13.31) | | 4.94 (0.00*-26.25) | | 108.61 (-162.22-194.02) | | |  | 1.92 (-0.00*-10.34) | 1.52 (0.00*-7.89) | | | -20.90 (-104.71-8.09) | |  | -0.71 (-0.83--0.59) | | | -0.58 (-7.18-6.5) |
| Marshall Islands | |  | 0.28 (-0.00*-1.44) | | 0.44 (-0.00*-2.33) | | 60.01 (-102.99-113.47) | | |  | 1.82 (0.00*-9.37) | 1.40 (0.00*-7.27) | | | -22.81 (-94.83-2.32) | |  | -0.76 (-0.84--0.67) | | | -0.64 (-17.75-20.03) |
| Micronesia (Federated States of) | |  | 0.83 (-0.00*-4.33) | | 0.90 (0.00*-4.67) | | 9.29 (-87.48-56.31) | | |  | 1.79 (0.00*-9.35) | 1.35 (0.00*-6.90) | | | -24.50 (-94.98-4.39) | |  | -0.94 (-1.03--0.85) | | | -0.86 (-10.34-9.63) |
| Papua New Guinea | |  | 23.12 (-0.00*-126.73) | | 50.79 (-0.00*-276.40) | | 119.70 (-77.00-229.29) | | |  | 1.44 (-0.00*-7.60) | 1.13 (0.00*-5.96) | | | -21.53 (-95.43-13.67) | |  | -0.79 (-0.84--0.75) | | | -0.8 (-2.77-1.22) |
| Tonga | |  | 0.83 (-0.00*-4.39) | | 1.03 (0.00*-5.27) | | 24.07 (-104.25-77.51) | | |  | 1.65 (-0.00*-8.68) | 1.33 (0.00*-6.72) | | | -19.14 (-99.26-9.84) | |  | -0.62 (-0.74--0.50) | | | -0.49 (-9.37-9.27) |
| Kazakhstan | |  | 345.92 (0.00*-1714.22) | | 149.18 (0.00*-777.57) | | -56.87 (-98.42--50.94) | | |  | 2.73 (0.00*-13.55) | 0.84 (0.00*-4.36) | | | -69.38 (-98.24--65.15) | |  | -3.65 (-3.86--3.44) | | | -3.56 (-4.21--2.9) |
| Georgia | |  | 87.53 (-0.00*-434.34) | | 55.05 (0.00*-281.37) | | -37.10 (-99.14--29.34) | | |  | 1.40 (0.00*-6.95) | 0.92 (0.00*-4.72) | | | -34.11 (-100.99--26.79) | |  | -0.31 (-0.79-0.18) | | | -1.14 (-2.53-0.27) |
| Vanuatu | |  | 0.91 (-0.00*-4.95) | | 2.04 (0.00*-10.78) | | 124.77 (-75.70-214.29) | | |  | 1.62 (0.00*-8.46) | 1.29 (0.00*-6.63) | | | -20.67 (-92.42-3.20) | |  | -0.87 (-0.92--0.82) | | | -0.71 (-9.85-9.36) |
| Azerbaijan | |  | 103.42 (0.00*-512.44) | | 108.91 (-0.00*-579.53) | | 5.31 (-100.78-31.61) | | |  | 2.07 (0.00*-10.26) | 1.12 (-0.00*-5.95) | | | -46.11 (-95.19--33.10) | |  | -1.94 (-2.09--1.79) | | | -2.29 (-3.21--1.35) |
| Armenia | |  | 48.05 (0.00*-237.83) | | 36.42 (0.00*-190.00*) | | -24.19 (-103.25--15.83) | | |  | 1.76 (0.00*-8.76) | 0.84 (0.00*-4.37) | | | -52.36 (-101.43--45.30) | |  | -2.01 (-2.22--1.80) | | | -2.43 (-4.15--0.68) |
| Mongolia | |  | 46.68 (0.00*-230.18) | | 65.24 (0.00*-339.67) | | 39.77 (-106.78-75.26) | | |  | 4.52 (0.00*-22.13) | 2.96 (0.00*-15.68) | | | -34.64 (-101.13--18.45) | |  | -1.77 (-1.92--1.61) | | | -1.62 (-3.08--0.15) |
| Turkmenistan | |  | 33.88 (-0.00*-167.80) | | 30.23 (-0.00*-159.07) | | -10.78 (-102.75-12.69) | | |  | 1.78 (0.00*-8.68) | 0.74 (-0.00*-3.90) | | | -58.08 (-100.77--47.57) | |  | -2.85 (-3.15--2.54) | | | -2.95 (-4.67--1.2) |
| Tajikistan | |  | 63.24 (-0.00*-316.57) | | 62.38 (0.00*-333.05) | | -1.37 (-98.41-23.53) | | |  | 2.32 (-0.00*-11.60) | 1.12 (0.00*-6.00) | | | -51.57 (-99.53--40.72) | |  | -2.24 (-2.50--1.98) | | | -2.3 (-3.43--1.16) |
| Kyrgyzstan | |  | 76.33 (0.00*-375.31) | | 57.73 (0.00*-301.68) | | -24.37 (-92.31--12.17) | | |  | 2.55 (0.00*-12.58) | 1.19 (0.00*-6.19) | | | -53.36 (-92.15--45.87) | |  | -2.19 (-2.41--1.97) | | | -2.48 (-3.66--1.29) |
| Uzbekistan | |  | 192.97 (0.00*-972.54) | | 157.63 (0.00*-805.41) | | -18.32 (-102.23--3.80) | | |  | 1.67 (0.00*-8.40) | 0.59 (0.00*-3.03) | | | -64.49 (-100.66--58.20) | |  | -3.01 (-3.21--2.81) | | | -3.1 (-3.8--2.39) |
| Bosnia and Herzegovina | |  | 45.24 (-0.00*-221.88) | | 45.87 (-0.00*-236.12) | | 1.39 (-50.88-27.14) | | |  | 1.15 (-0.00*-5.63) | 0.73 (-0.00*-3.72) | | | -36.77 (-65.94--20.60) | |  | -1.67 (-1.84--1.50) | | | -1.83 (-3.7-0.07) |
| Croatia | |  | 116.54 (-0.00*-588.12) | | 66.37 (-0.00*-329.70) | | -43.05 (-81.71--31.00) | | |  | 2.01 (-0.00*-10.08) | 0.71 (-0.00*-3.53) | | | -64.58 (-90.13--57.01) | |  | -3.29 (-3.40--3.17) | | | -3.28 (-4.86--1.68) |
| Hungary | |  | 247.64 (-0.00*-1222.86) | | 116.69 (-0.00*-574.66) | | -52.88 (-89.32--43.78) | | |  | 1.69 (-0.00*-8.38) | 0.59 (-0.00*-2.90) | | | -65.13 (-90.02--58.49) | |  | -3.34 (-3.53--3.15) | | | -3.31 (-4.38--2.24) |
| Albania | |  | 28.26 (-0.00*-143.19) | | 38.04 (0.00*-195.97) | | 34.62 (-77.76-92.29) | | |  | 1.47 (-0.00*-7.46) | 0.88 (0.00*-4.51) | | | -40.31 (-89.51--18.57) | |  | -1.56 (-1.81--1.30) | | | -1.62 (-3.49-0.29) |
| Bulgaria | |  | 222.16 (-0.00*-1103.95) | | 134.91 (-0.00*-662.15) | | -39.27 (-86.26--27.44) | | |  | 1.88 (-0.00*-9.36) | 0.94 (-0.00*-4.63) | | | -49.97 (-83.24--39.31) | |  | -1.91 (-2.11--1.72) | | | -2.03 (-3.18--0.87) |
| Montenegro | |  | 4.44 (-0.00*-21.55) | | 6.23 (-0.00*-31.31) | | 40.32 (-44.53-73.22) | | |  | 0.72 (-0.00*-3.51) | 0.66 (-0.00*-3.28) | | | -9.12 (-73.10-11.67) | |  | -0.43 (-0.63--0.24) | | | -0.79 (-5.52-4.17) |
| Czechia | |  | 198.11 (-0.00*-982.08) | | 101.53 (-0.00*-503.51) | | -48.75 (-81.69--38.74) | | |  | 1.42 (-0.00*-7.02) | 0.46 (-0.00*-2.26) | | | -67.77 (-89.22--60.98) | |  | -3.85 (-3.95--3.74) | | | -3.62 (-4.81--2.42) |
| North Macedonia | |  | 32.96 (-0.00*-157.63) | | 36.23 (-0.00*-177.78) | | 9.92 (-46.96-43.44) | | |  | 1.83 (-0.00*-8.79) | 1.17 (-0.00*-5.72) | | | -36.29 (-67.77--18.48) | |  | -1.76 (-2.02--1.49) | | | -1.63 (-3.67-0.46) |
| Poland | |  | 731.60 (0.00*-3648.95) | | 507.23 (0.00*-2513.00) | | -30.67 (-71.85-4.97) | | |  | 1.69 (0.00*-8.40) | 0.70 (0.00*-3.46) | | | -58.69 (-74.36--38.67) | |  | -2.99 (-3.13--2.86) | | | -2.85 (-3.35--2.35) |
| Romania | |  | 348.09 (-0.00*-1794.63) | | 322.72 (0.00*-1612.27) | | -7.29 (-89.13-9.02) | | |  | 1.26 (-0.00*-6.47) | 0.87 (0.00*-4.33) | | | -30.99 (-92.75--19.09) | |  | -1.40 (-1.55--1.24) | | | -1.46 (-2.19--0.74) |
| Serbia | |  | 118.39 (-0.00*-587.02) | | 108.61 (-0.00*-534.05) | | -8.26 (-67.60-18.23) | | |  | 1.16 (-0.00*-5.75) | 0.65 (0.00*-3.18) | | | -44.43 (-82.96--29.12) | |  | -2.27 (-2.49--2.06) | | | -2.31 (-3.57--1.03) |
| Slovakia | |  | 90.12 (-0.00*-438.73) | | 65.56 (-0.00*-330.10) | | -27.26 (-89.61--10.83) | | |  | 1.50 (-0.00*-7.32) | 0.68 (0.00*-3.44) | | | -54.49 (-97.21--44.31) | |  | -2.49 (-2.59--2.39) | | | -2.56 (-3.97--1.13) |
| Slovenia | |  | 39.69 (-0.00*-195.52) | | 26.73 (-0.00*-132.21) | | -32.65 (-77.72--18.91) | | |  | 1.60 (-0.00*-7.88) | 0.56 (-0.00*-2.81) | | | -64.68 (-86.02--57.52) | |  | -3.50 (-3.61--3.38) | | | -3.62 (-6.21--0.96) |
| Belarus | |  | 280.35 (-0.00*-1522.98) | | 133.80 (-0.00*-718.43) | | -52.27 (-95.92-21.86) | | |  | 2.16 (-0.00*-11.74) | 0.84 (-0.00*-4.51) | | | -60.95 (-100.35-9.09) | |  | -3.59 (-3.81--3.37) | | | -3.29 (-4.08--2.49) |
| Estonia | |  | 29.70 (-0.00*-170.26) | | 15.23 (-0.00*-86.73) | | -48.74 (-99.75-47.78) | | |  | 1.45 (-0.00*-8.32) | 0.56 (-0.00*-3.14) | | | -61.29 (-99.66-21.20) | |  | -3.29 (-3.41--3.18) | | | -3.51 (-6.6--0.31) |
| Latvia | |  | 61.90 (-0.00*-335.41) | | 30.40 (0.00*-160.42) | | -50.88 (-90.59-5.33) | | |  | 1.73 (-0.00*-9.34) | 0.78 (0.00*-4.05) | | | -55.08 (-93.13--5.04) | |  | -2.70 (-2.85--2.56) | | | -2.88 (-4.99--0.72) |
| Lithuania | |  | 82.89 (0.00*-435.34) | | 46.77 (-0.00*-240.80) | | -43.57 (-100.16-51.11) | | |  | 1.84 (0.00*-9.65) | 0.81 (-0.00*-4.17) | | | -55.80 (-99.73-21.93) | |  | -2.58 (-2.70--2.46) | | | -2.57 (-4.2--0.92) |
| Republic of Moldova | |  | 62.21 (-0.00*-334.84) | | 34.59 (-0.00*-187.71) | | -44.40 (-96.67-28.54) | | |  | 1.41 (0.00*-7.60) | 0.58 (-0.00*-3.15) | | | -58.85 (-96.49-4.06) | |  | -2.32 (-2.68--1.95) | | | -3 (-4.82--1.15) |
| Russian Federation | |  | 4499.25 (-0.00*-23008.44) | | 2438.74 (0.00*-12348.06) | | -45.80 (-106.82--35.82) | | |  | 2.48 (-0.00*-12.65) | 1.02 (0.00*-5.15) | | | -58.87 (-106.85--48.82) | |  | -3.05 (-3.16--2.94) | | | -2.93 (-3.13--2.72) |
| Ukraine | |  | 1306.35 (-0.00*-7142.17) | | 541.02 (-0.00*-3006.87) | | -58.59 (-115.25--29.91) | | |  | 1.83 (-0.00*-9.99) | 0.71 (-0.00*-3.96) | | | -60.97 (-113.83--27.72) | |  | -3.49 (-3.68--3.30) | | | -3.49 (-3.88--3.09) |
| Brunei Darussalam | |  | 1.96 (0.00*-9.96) | | 2.65 (0.00*-13.34) | | 35.16 (-77.42-68.16) | | |  | 1.95 (0.00*-9.92) | 0.84 (0.00*-4.30) | | | -56.98 (-87.76--46.38) | |  | -2.50 (-2.78--2.22) | | | -2.6 (-9.32-4.62) |
| Japan | |  | 4680.05 (0.00*-23010.52) | | 4801.23 (0.00*-24191.03) | | 2.59 (-87.96-8.72) | | |  | 2.81 (0.00*-13.86) | 1.09 (0.00*-5.46) | | | -61.22 (-93.58--59.76) | |  | -3.08 (-3.13--3.04) | | | -3.49 (-3.72--3.26) |
| Republic of Korea | |  | 1348.47 (0.00*-6571.07) | | 1028.66 (0.00*-5083.89) | | -23.72 (-95.39-7.94) | | |  | 4.61 (0.00*-22.14) | 1.11 (0.00*-5.50) | | | -75.94 (-95.41--67.50) | |  | -4.99 (-5.15--4.83) | | | -5.09 (-5.41--4.76) |
| Singapore | |  | 28.86 (0.00*-141.15) | | 31.16 (0.00*-154.89) | | 7.97 (-58.45-22.01) | | |  | 1.37 (0.00*-6.71) | 0.38 (0.00*-1.87) | | | -72.65 (-91.37--69.69) | |  | -4.27 (-4.52--4.02) | | | -4.43 (-6.29--2.52) |
| Australia | |  | 85.74 (0.00*-482.29) | | 109.13 (0.00*-629.46) | | 27.28 (-94.26-121.80) | | |  | 0.44 (0.00*-2.49) | 0.23 (-0.00*-1.34) | | | -47.02 (-98.10-19.07) | |  | -2.01 (-2.11--1.92) | | | -1.94 (-3.06--0.81) |
| New Zealand | |  | 27.39 (-0.00*-143.13) | | 29.02 (0.00*-157.23) | | 5.93 (-120.67-118.82) | | |  | 0.70 (-0.00*-3.65) | 0.34 (0.00*-1.84) | | | -51.47 (-110.63-6.33) | |  | -2.37 (-2.64--2.10) | | | -2.41 (-4.4--0.38) |
| Andorra | |  | 0.49 (0.00*-2.69) | | 0.73 (0.00*-4.28) | | 50.88 (-93.73-369.43) | | |  | 0.89 (0.00*-4.96) | 0.46 (0.00*-2.66) | | | -48.60 (-96.71-93.88) | |  | -1.90 (-2.16--1.64) | | | -1.91 (-15.87-14.36) |
| Austria | |  | 161.45 (-0.00*-812.40) | | 71.99 (0.00*-364.50) | | -55.41 (-102.03--1.04) | | |  | 1.31 (-0.00*-6.60) | 0.37 (0.00*-1.88) | | | -71.70 (-102.45--36.61) | |  | -3.99 (-4.16--3.81) | | | -3.74 (-5.12--2.35) |
| Belgium | |  | 152.54 (-0.00*-772.53) | | 90.50 (-0.00*-459.54) | | -40.67 (-90.60--31.85) | | |  | 0.96 (-0.00*-4.87) | 0.36 (-0.00*-1.80) | | | -63.09 (-97.01--57.56) | |  | -3.08 (-3.28--2.87) | | | -2.96 (-4.35--1.55) |
| Cyprus | |  | 5.84 (0.00*-30.03) | | 8.59 (0.00*-45.37) | | 46.99 (-31.89-352.64) | | |  | 0.89 (0.00*-4.54) | 0.44 (0.00*-2.31) | | | -50.70 (-75.13-94.61) | |  | -1.88 (-2.10--1.67) | | | -1.85 (-10.08-7.13) |
| Denmark | |  | 56.53 (0.00*-294.32) | | 42.99 (0.00*-225.58) | | -23.95 (-94.89-91.03) | | |  | 0.69 (0.00*-3.57) | 0.35 (0.00*-1.83) | | | -49.06 (-94.42-22.73) | |  | -2.05 (-2.35--1.75) | | | -2.48 (-4.67--0.25) |
| Finland | |  | 69.06 (-0.00*-364.92) | | 41.52 (-0.00*-218.44) | | -39.88 (-108.69-19.62) | | |  | 0.96 (-0.00*-5.05) | 0.31 (-0.00*-1.60) | | | -67.94 (-103.40--26.92) | |  | -3.58 (-3.75--3.40) | | | -3.61 (-5.5--1.68) |
| France | |  | 667.69 (0.00*-3541.71) | | 502.78 (-0.00*-2641.20) | | -24.70 (-97.46-246.63) | | |  | 0.77 (0.00*-4.10) | 0.33 (-0.00*-1.73) | | | -57.22 (-99.20-133.20) | |  | -2.53 (-2.65--2.42) | | | -2.13 (-2.68--1.58) |
| Germany | |  | 1400.08 (0.00*-7438.80) | | 882.40 (0.00*-4466.36) | | -36.98 (-102.64-59.44) | | |  | 1.07 (0.00*-5.68) | 0.44 (0.00*-2.20) | | | -59.26 (-71.65-16.25) | |  | -2.99 (-3.17--2.82) | | | -2.82 (-3.23--2.4) |
| Greece | |  | 182.94 (-0.00*-959.76) | | 143.72 (0.00*-752.21) | | -21.44 (-103.39-129.30) | | |  | 1.22 (0.00*-6.37) | 0.55 (0.00*-2.87) | | | -54.71 (-72.43-84.30) | |  | -2.87 (-3.11--2.62) | | | -2.61 (-3.77--1.44) |
| Iceland | |  | 3.04 (0.00*-15.44) | | 2.03 (0.00*-10.61) | | -33.00 (-90.39-42.75) | | |  | 1.04 (0.00*-5.28) | 0.33 (0.00*-1.74) | | | -68.10 (-92.45--30.68) | |  | -3.53 (-3.62--3.44) | | | -3.46 (-11.03-4.76) |
| Ireland | |  | 37.40 (-0.00*-200.08) | | 25.42 (-0.00*-138.61) | | -32.02 (-94.90-85.59) | | |  | 0.91 (-0.00*-4.87) | 0.31 (-0.00*-1.69) | | | -65.94 (-101.79--8.43) | |  | -3.37 (-3.45--3.29) | | | -3.41 (-5.69--1.07) |
| Israel | |  | 38.53 (0.00*-202.27) | | 49.37 (0.00*-256.16) | | 28.15 (-73.79-323.56) | | |  | 0.82 (0.00*-4.27) | 0.39 (0.00*-1.99) | | | -52.69 (-92.70-62.62) | |  | -2.81 (-2.97--2.65) | | | -2.6 (-4.38--0.8) |
| Italy | |  | 1368.94 (0.00*-6948.31) | | 906.31 (-0.00*-4751.75) | | -33.79 (-105.56--28.91) | | |  | 1.53 (0.00*-7.75) | 0.56 (-0.00*-2.90) | | | -63.15 (-103.03--57.67) | |  | -3.20 (-3.28--3.12) | | | -3.22 (-3.69--2.75) |
| Luxembourg | |  | 5.38 (-0.00*-27.86) | | 3.75 (0.00*-19.77) | | -30.32 (-129.56-52.80) | | |  | 0.99 (-0.00*-5.15) | 0.33 (0.00*-1.74) | | | -66.46 (-115.41--23.82) | |  | -3.41 (-3.51--3.30) | | | -3.88 (-10.17-2.85) |
| Malta | |  | 4.36 (0.00*-22.32) | | 3.75 (0.00*-19.29) | | -13.86 (-91.39-83.70) | | |  | 1.04 (0.00*-5.30) | 0.37 (0.00*-1.87) | | | -64.78 (-96.63--2.01) | |  | -3.18 (-3.34--3.02) | | | -3.05 (-9.64-4.02) |
| Netherlands | |  | 181.37 (0.00*-975.81) | | 125.70 (0.00*-672.70) | | -30.69 (-99.25-173.98) | | |  | 0.89 (0.00*-4.78) | 0.34 (0.00*-1.81) | | | -61.84 (-105.38-53.40) | |  | -3.12 (-3.24--3.01) | | | -3.12 (-4.26--1.97) |
| Portugal | |  | 265.05 (0.00*-1461.02) | | 197.39 (0.00*-1062.49) | | -25.53 (-66.24-299.58) | | |  | 1.97 (0.00*-10.86) | 0.78 (-0.00*-4.15) | | | -60.15 (-67.56-158.51) | |  | -2.88 (-2.93--2.84) | | | -3.03 (-3.9--2.15) |
| Norway | |  | 54.72 (-0.00*-291.50) | | 28.07 (0.00*-150.89) | | -48.71 (-103.58--7.42) | | |  | 0.77 (-0.00*-4.09) | 0.26 (0.00*-1.41) | | | -65.87 (-104.17--40.95) | |  | -3.49 (-3.55--3.43) | | | -3.58 (-5.97--1.13) |
| Sweden | |  | 111.05 (0.00*-587.48) | | 60.02 (0.00*-314.08) | | -45.95 (-98.98--4.14) | | |  | 0.70 (0.00*-3.69) | 0.25 (0.00*-1.32) | | | -63.93 (-101.41--40.00*) | |  | -3.44 (-3.65--3.24) | | | -3.45 (-5.15--1.73) |
| Spain | |  | 499.56 (-0.00*-2918.79) | | 354.36 (0.00*-2055.04) | | -29.07 (-87.47-699.94) | | |  | 0.93 (-0.00*-5.37) | 0.36 (0.00*-2.03) | | | -61.57 (-98.22-387.39) | |  | -2.88 (-3.02--2.74) | | | -2.96 (-3.53--2.4) |
| United Kingdom | |  | 774.64 (-0.00*-4185.52) | | 448.62 (-0.00*-2434.70) | | -42.09 (-120.36-39.69) | | |  | 0.81 (-0.00*-4.40) | 0.32 (-0.00*-1.71) | | | -61.24 (-111.60--10.30) | |  | -3.04 (-3.16--2.92) | | | -2.73 (-3.37--2.08) |
| Switzerland | |  | 84.96 (-0.00*-450.76) | | 54.93 (0.00*-291.46) | | -35.35 (-95.21-81.79) | | |  | 0.79 (-0.00*-4.16) | 0.28 (0.00*-1.49) | | | -64.31 (-88.28-7.12) | |  | -3.00 (-3.37--2.63) | | | -3.28 (-4.98--1.56) |
| Argentina | |  | 363.06 (0.00*-1853.52) | | 382.32 (0.00*-1939.50) | | 5.30 (-130.54-95.21) | | |  | 1.15 (0.00*-5.84) | 0.68 (0.00*-3.43) | | | -41.29 (-116.90-1.94) | |  | -1.46 (-1.61--1.31) | | | -1.35 (-1.87--0.82) |
| Uruguay | |  | 52.74 (0.00*-264.21) | | 50.05 (0.00*-253.48) | | -5.11 (-90.99-37.49) | | |  | 1.35 (0.00*-6.75) | 0.87 (0.00*-4.42) | | | -35.42 (-94.16--2.75) | |  | -1.53 (-1.64--1.41) | | | -1.36 (-3.01-0.31) |
| Chile | |  | 269.66 (0.00*-1353.44) | | 319.43 (0.00*-1605.42) | | 18.46 (-112.48-75.93) | | |  | 2.79 (0.00*-13.97) | 1.23 (0.00*-6.18) | | | -55.97 (-100.60--32.25) | |  | -2.54 (-2.65--2.42) | | | -2.38 (-3.02--1.74) |
| United States of America | |  | 1217.15 (0.00*-6444.34) | | 1255.31 (0.00*-6523.05) | | 3.14 (-38.63-1202.41) | | |  | 0.38 (0.00*-2.00) | 0.22 (0.00*-1.13) | | | -42.42 (-46.64-686.99) | |  | -1.89 (-1.95--1.83) | | | -1.54 (-1.83--1.26) |
| Canada | |  | 196.21 (0.00*-1015.03) | | 225.90 (0.00*-1168.07) | | 15.13 (-171.37-168.55) | | |  | 0.60 (0.00*-3.11) | 0.30 (0.00*-1.56) | | | -49.93 (-112.48-40.08) | |  | -2.05 (-2.17--1.94) | | | -1.84 (-2.63--1.05) |
| Antigua and Barbuda | |  | 0.74 (-0.00*-3.78) | | 0.77 (-0.00*-4.05) | | 3.60 (-104.15-50.88) | | |  | 1.33 (-0.00*-6.81) | 0.76 (-0.00*-4.01) | | | -42.86 (-105.94--10.71) | |  | -1.80 (-1.97--1.63) | | | -1.87 (-13.36-11.14) |
| Bahamas | |  | 1.57 (-0.00*-8.28) | | 2.55 (-0.00*-14.05) | | 62.72 (-89.68-208.93) | | |  | 1.04 (-0.00*-5.44) | 0.66 (-0.00*-3.61) | | | -36.31 (-96.30-4.09) | |  | -1.44 (-1.58--1.30) | | | -1.36 (-7.36-5.03) |
| Belize | |  | 0.86 (-0.00*-4.45) | | 2.00 (0.00*-10.46) | | 132.29 (-83.82-238.41) | | |  | 0.93 (-0.00*-4.82) | 0.70 (0.00*-3.66) | | | -25.03 (-90.42-23.14) | |  | -1.11 (-1.70--0.52) | | | -0.65 (-7.94-7.21) |
| Barbados | |  | 3.61 (-0.00*-19.35) | | 3.42 (-0.00*-19.32) | | -5.31 (-95.89-529.83) | | |  | 1.18 (0.00*-6.36) | 0.66 (-0.00*-3.73) | | | -44.22 (-101.59-183.97) | |  | -1.89 (-2.11--1.67) | | | -1.78 (-7.7-4.51) |
| Dominica | |  | 1.32 (-0.00*-6.89) | | 1.22 (-0.00*-6.44) | | -7.16 (-100.13-32.53) | | |  | 2.21 (-0.00*-11.61) | 1.51 (-0.00*-7.98) | | | -31.82 (-115.68--6.36) | |  | -1.32 (-1.44--1.20) | | | -1.1 (-10.74-9.57) |
| Cuba | |  | 61.04 (-0.00*-316.67) | | 82.88 (-0.00*-428.80) | | 35.78 (-92.21-112.84) | | |  | 0.60 (-0.00*-3.14) | 0.42 (-0.00*-2.15) | | | -31.27 (-106.21--5.17) | |  | -1.02 (-1.13--0.91) | | | -1.3 (-2.73-0.15) |
| Dominican Republic | |  | 21.85 (0.00*-115.42) | | 51.06 (-0.00*-273.44) | | 133.72 (-101.35-246.59) | | |  | 0.64 (0.00*-3.38) | 0.52 (-0.00*-2.76) | | | -19.98 (-100.32-6.32) | |  | -0.28 (-0.45--0.11) | | | -0.22 (-1.7-1.28) |
| Grenada | |  | 0.82 (0.00*-4.23) | | 0.68 (-0.00*-3.58) | | -16.93 (-101.08-12.43) | | |  | 1.10 (0.00*-5.69) | 0.64 (-0.00*-3.35) | | | -41.93 (-101.26--12.68) | |  | -1.56 (-1.89--1.22) | | | -1.49 (-12.01-10.28) |
| Haiti | |  | 64.60 (-0.00*-345.24) | | 91.18 (-0.00*-486.88) | | 41.16 (-82.59-184.38) | | |  | 2.16 (-0.00*-11.40) | 1.38 (-0.00*-7.33) | | | -36.02 (-98.32-11.22) | |  | -1.32 (-1.42--1.23) | | | -1.36 (-2.6--0.11) |
| Guyana | |  | 3.82 (-0.00*-19.82) | | 3.63 (-0.00*-20.16) | | -4.78 (-85.61-58.04) | | |  | 1.06 (-0.00*-5.47) | 0.59 (-0.00*-3.26) | | | -43.98 (-104.55--18.03) | |  | -1.65 (-1.93--1.38) | | | -1.29 (-5.94-3.59) |
| Jamaica | |  | 21.72 (0.00*-111.72) | | 21.63 (0.00*-117.11) | | -0.42 (-97.00-55.92) | | |  | 1.19 (0.00*-6.10) | 0.69 (0.00*-3.74) | | | -41.89 (-99.71--7.32) | |  | -1.84 (-2.17--1.52) | | | -1.59 (-3.83-0.71) |
| Saint Vincent and the Grenadines | |  | 0.95 (-0.00*-4.90) | | 1.09 (-0.00*-5.79) | | 14.47 (-100.35-101.96) | | |  | 1.37 (-0.00*-7.07) | 0.79 (-0.00*-4.21) | | | -42.36 (-101.00--3.36) | |  | -1.76 (-2.00--1.52) | | | -1.78 (-11.05-8.47) |
| Saint Lucia | |  | 1.37 (-0.00*-7.18) | | 1.94 (-0.00*-10.74) | | 41.62 (-101.06-110.02) | | |  | 1.69 (-0.00*-8.80) | 0.82 (-0.00*-4.55) | | | -51.15 (-100.50--32.43) | |  | -2.80 (-3.11--2.50) | | | -2.57 (-9.94-5.41) |
| Suriname | |  | 2.07 (0.00*-11.03) | | 3.23 (-0.00*-17.89) | | 55.98 (-127.08-166.99) | | |  | 0.85 (-0.00*-4.50) | 0.52 (-0.00*-2.87) | | | -38.76 (-108.98--5.28) | |  | -1.45 (-1.67--1.22) | | | -1.31 (-6.66-4.36) |
| Trinidad and Tobago | |  | 6.91 (-0.00*-36.22) | | 7.36 (0.00*-38.50) | | 6.57 (-116.56-119.34) | | |  | 0.87 (-0.00*-4.53) | 0.39 (0.00*-2.02) | | | -55.65 (-102.03--3.30) | |  | -2.78 (-3.00--2.56) | | | -2.42 (-6.17-1.48) |
| Bolivia (Plurinational State of) | |  | 124.90 (0.00*-631.16) | | 218.64 (0.00*-1113.11) | | 75.06 (-110.96-144.46) | | |  | 4.17 (0.00*-21.20) | 2.58 (0.00*-13.23) | | | -38.10 (-103.76--15.94) | |  | -1.56 (-1.62--1.50) | | | -1.81 (-2.6--1.02) |
| Peru | |  | 269.39 (0.00*-1383.11) | | 531.44 (0.00*-2774.10) | | 97.28 (-92.47-177.87) | | |  | 2.33 (-0.00*-12.03) | 1.60 (0.00*-8.33) | | | -31.61 (-90.01--1.48) | |  | -1.56 (-1.84--1.29) | | | -1.55 (-2.01--1.09) |
| Ecuador | |  | 127.97 (0.00*-636.87) | | 238.24 (0.00*-1216.71) | | 86.16 (-79.44-153.32) | | |  | 2.55 (0.00*-12.69) | 1.50 (0.00*-7.64) | | | -41.29 (-101.65--20.97) | |  | -1.81 (-2.24--1.38) | | | -1.48 (-2.14--0.82) |
| Colombia | |  | 432.48 (-0.00*-2145.72) | | 615.87 (-0.00*-3149.04) | | 42.40 (-80.08-83.10) | | |  | 2.61 (-0.00*-12.88) | 1.12 (-0.00*-5.70) | | | -57.15 (-81.45--44.17) | |  | -3.13 (-3.28--2.99) | | | -2.66 (-3.04--2.28) |
| El Salvador | |  | 47.21 (0.00*-238.16) | | 89.86 (0.00*-456.53) | | 90.34 (-98.94-216.23) | | |  | 1.61 (0.00*-8.13) | 1.42 (0.00*-7.23) | | | -11.47 (-95.48-51.82) | |  | -0.77 (-1.01--0.53) | | | -0.58 (-1.63-0.48) |
| Costa Rica | |  | 50.49 (0.00*-250.12) | | 74.74 (-0.00*-378.62) | | 48.03 (-113.04-103.46) | | |  | 2.97 (0.00*-14.70) | 1.36 (-0.00*-6.87) | | | -54.27 (-104.31--36.32) | |  | -2.83 (-3.05--2.61) | | | -2.44 (-3.59--1.27) |
| Honduras | |  | 28.08 (0.00*-139.39) | | 97.68 (0.00*-497.80) | | 247.85 (-119.05-370.81) | | |  | 1.43 (0.00*-7.09) | 1.68 (-0.00*-8.55) | | | 17.12 (-109.73-56.19) | |  | 0.69 (0.48-0.90) | | | 0.11 (-1.24-1.48) |
| Nicaragua | |  | 16.76 (0.00*-84.91) | | 37.35 (0.00*-189.36) | | 122.89 (-7.05-270.96) | | |  | 1.14 (0.00*-5.74) | 0.79 (0.00*-3.99) | | | -30.65 (-66.86-23.17) | |  | -1.10 (-1.38--0.82) | | | -0.98 (-2.59-0.66) |
| Guatemala | |  | 78.06 (0.00*-388.75) | | 209.77 (0.00*-1086.93) | | 168.72 (-106.38-257.89) | | |  | 2.65 (0.00*-13.21) | 1.98 (0.00*-10.25) | | | -25.30 (-89.42-10.32) | |  | -1.30 (-1.98--0.61) | | | -0.78 (-1.57-0.02) |
| Mexico | |  | 495.67 (-0.00*-2517.86) | | 877.35 (-0.00*-4572.92) | | 77.00 (-100.55-234.31) | | |  | 1.29 (-0.00*-6.54) | 0.71 (-0.00*-3.70) | | | -44.89 (-102.60--2.35) | |  | -2.08 (-2.23--1.94) | | | -1.69 (-2.04--1.35) |
| Panama | |  | 16.82 (0.00*-84.37) | | 36.15 (0.00*-192.12) | | 114.84 (-127.48-194.66) | | |  | 1.17 (0.00*-5.86) | 0.81 (0.00*-4.31) | | | -30.55 (-108.69--2.88) | |  | -1.14 (-1.29--0.98) | | | -0.9 (-2.7-0.92) |
| Venezuela (Bolivarian Republic of) | |  | 150.87 (-0.00*-756.02) | | 256.40 (0.00*-1313.88) | | 69.94 (-44.02-183.91) | | |  | 1.64 (0.00*-8.26) | 0.88 (0.00*-4.50) | | | -46.61 (-78.71--9.05) | |  | -2.46 (-2.66--2.25) | | | -2.09 (-2.71--1.46) |
| Paraguay | |  | 18.21 (0.00*-92.54) | | 39.63 (0.00*-204.95) | | 117.61 (-121.84-210.35) | | |  | 0.85 (0.00*-4.33) | 0.70 (0.00*-3.63) | | | -17.41 (-108.90-20.77) | |  | -0.85 (-1.08--0.62) | | | -0.82 (-2.55-0.93) |
| Brazil | |  | 1337.64 (-0.00*-6704.13) | | 1948.40 (-0.00*-10007.20) | | 45.66 (-64.87-67.45) | | |  | 1.60 (-0.00*-8.04) | 0.78 (-0.00*-4.02) | | | -51.05 (-88.45--42.93) | |  | -2.39 (-2.45--2.34) | | | -2.2 (-2.44--1.97) |
| Algeria | |  | 35.67 (-0.00*-212.45) | | 59.67 (-0.00*-360.72) | | 67.29 (-101.58-553.28) | | |  | 0.32 (-0.00*-1.92) | 0.18 (-0.00*-1.09) | | | -43.02 (-100.87-142.28) | |  | -1.67 (-1.80--1.54) | | | -1.91 (-4.03-0.25) |
| Bahrain | |  | 1.12 (-0.00*-6.59) | | 2.37 (-0.00*-14.28) | | 111.23 (-118.94-663.34) | | |  | 0.73 (-0.00*-4.32) | 0.33 (-0.00*-1.99) | | | -55.04 (-102.09-148.89) | |  | -3.11 (-3.47--2.76) | | | -2.81 (-17.35-14.27) |
| Egypt | |  | 66.51 (-0.00*-377.23) | | 216.16 (0.00*-1297.48) | | 224.99 (-152.39-994.02) | | |  | 0.24 (-0.00*-1.40) | 0.36 (0.00*-2.16) | | | 48.70 (-102.37-513.00) | |  | 2.49 (1.86-3.12) | | | 1.94 (0.7-3.19) |
| Iran (Islamic Republic of) | |  | 306.53 (0.00*-1754.50) | | 492.48 (0.00*-2963.78) | | 60.66 (-60.67-434.72) | | |  | 1.23 (0.00*-7.20) | 0.66 (0.00*-4.04) | | | -46.06 (-86.27-119.75) | |  | -1.77 (-1.92--1.62) | | | -1.88 (-2.39--1.38) |
| Jordan | |  | 5.02 (-0.00*-28.51) | | 13.82 (-0.00*-81.94) | | 175.07 (-96.09-1174.03) | | |  | 0.38 (-0.00*-2.20) | 0.19 (-0.00*-1.17) | | | -48.84 (-98.14-160.55) | |  | -2.31 (-2.51--2.10) | | | -2.3 (-5.86-1.4) |
| Iraq | |  | 28.83 (-0.00*-167.74) | | 61.63 (-0.00*-374.53) | | 113.78 (-86.96-572.20) | | |  | 0.35 (-0.00*-2.05) | 0.26 (-0.00*-1.59) | | | -25.81 (-97.64-154.89) | |  | -1.25 (-1.37--1.13) | | | -1.29 (-2.8-0.24) |
| Kuwait | |  | 1.68 (0.00*-8.95) | | 4.83 (-0.00*-26.05) | | 186.94 (-75.20-487.42) | | |  | 0.29 (0.00*-1.56) | 0.18 (0.00*-1.00) | | | -36.50 (-94.81-44.71) | |  | -1.66 (-2.11--1.21) | | | -1.65 (-7.07-4.1) |
| Lebanon | |  | 11.35 (-0.00*-67.78) | | 16.31 (-0.00*-98.14) | | 43.63 (-89.50-408.11) | | |  | 0.54 (-0.00*-3.23) | 0.27 (-0.00*-1.59) | | | -50.67 (-98.96-81.44) | |  | -1.95 (-2.13--1.78) | | | -2.15 (-4.9-0.68) |
| Libya | |  | 7.67 (-0.00*-46.84) | | 17.23 (-0.00*-106.79) | | 124.71 (-101.14-703.56) | | |  | 0.41 (-0.00*-2.55) | 0.33 (-0.00*-2.06) | | | -19.31 (-104.10-221.13) | |  | -0.37 (-0.55--0.20) | | | -0.45 (-3.12-2.28) |
| Morocco | |  | 24.09 (-0.00*-138.47) | | 42.99 (-0.00*-263.23) | | 78.48 (-99.28-324.20) | | |  | 0.17 (-0.00*-0.98) | 0.13 (-0.00*-0.78) | | | -25.03 (-99.83-105.41) | |  | -0.83 (-0.92--0.74) | | | -1.05 (-2.92-0.85) |
| Palestine | |  | 5.07 (-0.00*-31.51) | | 7.43 (-0.00*-43.86) | | 46.50 (-121.23-600.86) | | |  | 0.61 (-0.00*-3.82) | 0.31 (-0.00*-1.87) | | | -48.56 (-100.83-152.66) | |  | -2.23 (-2.48--1.97) | | | -2.1 (-5.86-1.81) |
| Qatar | |  | 0.78 (-0.00*-4.45) | | 2.29 (-0.00*-13.25) | | 193.66 (-101.23-1237.27) | | |  | 0.85 (-0.00*-4.92) | 0.29 (-0.00*-1.75) | | | -65.86 (-98.13-78.78) | |  | -3.69 (-4.35--3.04) | | | -3.4 (-14.9-9.64) |
| Oman | |  | 4.16 (0.00*-23.94) | | 5.18 (-0.00*-30.53) | | 24.41 (-100.49-293.47) | | |  | 0.61 (0.00*-3.55) | 0.28 (-0.00*-1.66) | | | -54.35 (-100.03-32.97) | |  | -2.15 (-2.30--2.00) | | | -2.25 (-7.75-3.58) |
| Saudi Arabia | |  | 19.97 (0.00*-120.87) | | 37.05 (-0.00*-211.98) | | 85.56 (-122.44-853.43) | | |  | 0.35 (0.00*-2.11) | 0.19 (-0.00*-1.11) | | | -45.85 (-103.25-151.70) | |  | -2.10 (-2.29--1.91) | | | -1.67 (-3.64-0.34) |
| Syrian Arab Republic | |  | 21.67 (-0.00*-129.63) | | 37.40 (-0.00*-221.19) | | 72.60 (-100.93-288.53) | | |  | 0.42 (-0.00*-2.55) | 0.31 (-0.00*-1.81) | | | -27.32 (-100.69-100.14) | |  | -1.27 (-1.41--1.12) | | | -1.35 (-3.06-0.39) |
| Tunisia | |  | 16.73 (-0.00*-98.76) | | 28.15 (-0.00*-168.08) | | 68.30 (-106.65-520.03) | | |  | 0.34 (-0.00*-2.03) | 0.21 (-0.00*-1.28) | | | -37.40 (-98.99-240.06) | |  | -1.70 (-1.78--1.61) | | | -1.51 (-4.33-1.39) |
| Türkiye | |  | 385.50 (0.00*-2389.32) | | 470.35 (0.00*-2934.62) | | #N/A | | |  | 1.11 (0.00*-6.89) | 0.51 (0.00*-3.18) | | | #N/A | |  | -2.65 (-3.00--2.29) | | | -2.92 (-3.39--2.45) |
| Yemen | |  | 65.10 (-0.00*-410.83) | | 136.27 (-0.00*-890.04) | | 109.33 (-129.98-754.24) | | |  | 1.30 (-0.00*-8.24) | 0.98 (-0.00*-6.44) | | | -24.62 (-105.48-211.88) | |  | -1.14 (-1.24--1.04) | | | -1.14 (-2.59-0.34) |
| United Arab Emirates | |  | 3.37 (-0.00*-19.94) | | 11.16 (-0.00*-66.59) | | 230.98 (-95.28-1184.77) | | |  | 0.77 (-0.00*-4.73) | 0.39 (-0.00*-2.41) | | | -49.29 (-99.72-73.35) | |  | -0.80 (-1.34--0.26) | | | -1.88 (-7.93-4.57) |
| Afghanistan | |  | 142.27 (-0.00*-885.12) | | 161.69 (-0.00*-1025.44) | | 13.65 (-116.31-758.60) | | |  | 2.07 (-0.00*-12.89) | 1.59 (-0.00*-10.32) | | | -23.21 (-122.42-218.20) | |  | -1.05 (-1.30--0.79) | | | -0.86 (-1.92-0.22) |
| Bangladesh | |  | 355.64 (0.00*-1826.62) | | 569.92 (0.00*-2941.29) | | 60.25 (-3.57-1490.73) | | |  | 0.75 (0.00*-3.87) | 0.43 (0.00*-2.20) | | | -43.21 (-108.09-472.33) | |  | -1.76 (-2.00--1.51) | | | -1.65 (-2.16--1.14) |
| India | |  | 2989.33 (0.00*-15540.99) | | 5368.18 (0.00*-27163.54) | | 79.58 (44.34-175.37) | | |  | 0.63 (0.00*-3.29) | 0.45 (0.00*-2.31) | | | -27.89 (-40.25-26.10) | |  | -0.91 (-1.04--0.77) | | | -0.97 (-1.17--0.77) |
| Bhutan | |  | 1.51 (0.00*-8.06) | | 2.62 (0.00*-14.09) | | 72.97 (-20.03-1466.75) | | |  | 0.62 (0.00*-3.30) | 0.44 (0.00*-2.40) | | | -28.65 (-65.74-541.24) | |  | -0.97 (-1.10--0.85) | | | -1.25 (-8.89-7.03) |
| Nepal | |  | 61.23 (-0.00*-322.29) | | 110.06 (0.00*-558.04) | | 79.75 (-400.08-1626.05) | | |  | 0.66 (-0.00*-3.49) | 0.49 (0.00*-2.50) | | | -24.61 (-169.18-576.49) | |  | -0.71 (-0.99--0.43) | | | -0.98 (-2.22-0.28) |
| Pakistan | |  | 223.15 (-0.00*-1162.32) | | 448.12 (-0.00*-2197.83) | | 100.81 (27.69-1416.94) | | |  | 0.41 (-0.00*-2.15) | 0.38 (-0.00*-1.89) | | | -7.12 (-70.56-644.04) | |  | -0.44 (-0.72--0.16) | | | -0.27 (-0.8-0.27) |
| Angola | |  | 32.15 (0.00*-195.41) | | 64.32 (0.00*-367.93) | | 100.02 (-117.19-1231.48) | | |  | 0.88 (0.00*-5.30) | 0.60 (0.00*-3.35) | | | -31.86 (-90.46-569.46) | |  | -1.44 (-1.52--1.37) | | | -1.4 (-3.23-0.47) |
| Central African Republic | |  | 12.01 (0.00*-68.46) | | 18.91 (0.00*-109.83) | | 57.50 (-82.94-772.46) | | |  | 1.10 (-0.00*-6.27) | 0.89 (0.00*-5.12) | | | -18.98 (-70.24-498.35) | |  | -0.77 (-0.85--0.69) | | | -0.71 (-4.13-2.84) |
| Congo | |  | 9.33 (0.00*-54.52) | | 15.02 (-0.00*-85.41) | | 60.93 (-94.76-968.62) | | |  | 0.94 (0.00*-5.41) | 0.61 (-0.00*-3.39) | | | -35.51 (-107.75-427.32) | |  | -1.68 (-1.82--1.54) | | | -1.67 (-6.01-2.87) |
| Equatorial Guinea | |  | 1.77 (0.00*-10.64) | | 2.08 (0.00*-11.82) | | 17.77 (-158.24-987.37) | | |  | 0.97 (0.00*-5.72) | 0.45 (0.00*-2.52) | | | -53.60 (-109.84-516.56) | |  | -2.81 (-3.13--2.49) | | | -2.96 (-10.94-5.72) |
| Democratic Republic of the Congo | |  | 82.44 (0.00*-489.17) | | 156.52 (0.00*-949.84) | | #N/A | | |  | 0.57 (0.00*-3.40) | 0.46 (0.00*-2.79) | | | #N/A | |  | -0.69 (-0.73--0.64) | | | -0.65 (-1.8-0.52) |
| Gabon | |  | 4.26 (0.00*-24.52) | | 5.20 (0.00*-29.53) | | 21.87 (-102.30-795.02) | | |  | 0.79 (0.00*-4.51) | 0.55 (0.00*-3.04) | | | -30.99 (-97.47-581.40) | |  | -1.32 (-1.45--1.19) | | | -1.31 (-5.62-3.2) |
| Burundi | |  | 23.71 (0.00*-123.54) | | 28.23 (0.00*-146.49) | | 19.04 (-102.66-48.93) | | |  | 1.04 (0.00*-5.38) | 0.62 (0.00*-3.18) | | | -40.13 (-99.90--26.26) | |  | -2.16 (-2.37--1.96) | | | -2.14 (-4.62-0.41) |
| Comoros | |  | 1.52 (0.00*-8.01) | | 2.55 (0.00*-13.19) | | 67.20 (-91.99-116.87) | | |  | 0.80 (0.00*-4.14) | 0.55 (0.00*-2.83) | | | -31.08 (-95.26--11.51) | |  | -1.42 (-1.55--1.30) | | | -1.56 (-9.68-7.29) |
| Djibouti | |  | 0.97 (0.00*-5.09) | | 3.43 (0.00*-18.44) | | 254.50 (-52.86-381.04) | | |  | 0.75 (0.00*-3.87) | 0.60 (0.00*-3.11) | | | -20.89 (-89.37-2.81) | |  | -0.93 (-1.07--0.79) | | | -0.98 (-10.53-9.59) |
| Eritrea | |  | 13.11 (0.00*-67.49) | | 20.78 (-0.00*-113.01) | | 58.46 (-105.83-105.43) | | |  | 1.14 (0.00*-5.88) | 0.80 (-0.00*-4.29) | | | -29.84 (-102.42--13.29) | |  | -1.20 (-1.24--1.16) | | | -1.2 (-5.99-3.83) |
| Ethiopia | |  | 260.39 (0.00*-1327.44) | | 218.73 (-0.00*-1161.71) | | -16.00 (-98.61-0.77) | | |  | 1.30 (0.00*-6.63) | 0.53 (-0.00*-2.77) | | | -59.71 (-99.44--51.78) | |  | -3.44 (-3.65--3.23) | | | -3.43 (-4.54--2.31) |
| Madagascar | |  | 36.08 (0.00*-193.99) | | 53.49 (0.00*-277.18) | | 48.23 (-86.32-84.53) | | |  | 0.73 (0.00*-3.90) | 0.51 (0.00*-2.60) | | | -30.72 (-96.82--13.92) | |  | -1.26 (-1.32--1.19) | | | -1.28 (-2.83-0.3) |
| Kenya | |  | 40.86 (-0.00*-221.26) | | 100.85 (-0.00*-580.72) | | 146.79 (-13.78-240.09) | | |  | 0.52 (0.00*-2.79) | 0.48 (-0.00*-2.73) | | | -7.67 (-82.74-31.69) | |  | 0.13 (-0.09-0.35) | | | -0.05 (-1.39-1.31) |
| Mauritius | |  | 9.30 (-0.00*-46.77) | | 14.79 (0.00*-72.96) | | 58.97 (-87.92-73.00) | | |  | 1.33 (0.00*-6.68) | 0.82 (0.00*-4.08) | | | -38.03 (-94.39--33.01) | |  | -2.31 (-2.69--1.93) | | | -2.09 (-4.84-0.74) |
| Malawi | |  | 12.17 (0.00*-60.76) | | 17.85 (0.00*-91.51) | | 46.71 (-94.69-82.83) | | |  | 0.33 (0.00*-1.66) | 0.25 (0.00*-1.29) | | | -23.38 (-96.81--5.83) | |  | -1.19 (-1.45--0.93) | | | -1.14 (-4.13-1.95) |
| Mozambique | |  | 36.39 (0.00*-176.78) | | 60.84 (-0.00*-319.44) | | 67.18 (-105.23-105.25) | | |  | 0.70 (0.00*-3.42) | 0.64 (0.00*-3.34) | | | -8.56 (-100.03-13.75) | |  | 0.14 (-0.03-0.31) | | | 0.12 (-1.48-1.74) |
| Rwanda | |  | 30.81 (0.00*-156.62) | | 31.66 (0.00*-164.25) | | 2.76 (-97.12-38.38) | | |  | 1.11 (0.00*-5.57) | 0.55 (0.00*-2.81) | | | -50.71 (-101.10--35.93) | |  | -3.32 (-3.71--2.92) | | | -3.33 (-5.52--1.08) |
| Somalia | |  | 28.44 (0.00*-143.94) | | 55.75 (0.00*-288.99) | | 96.01 (-75.22-144.22) | | |  | 1.20 (0.00*-5.98) | 0.94 (0.00*-4.85) | | | -21.66 (-96.05--3.77) | |  | -0.89 (-0.96--0.81) | | | -0.91 (-3.36-1.61) |
| Seychelles | |  | 0.49 (0.00*-2.45) | | 0.54 (-0.00*-2.71) | | 10.50 (-89.28-28.19) | | |  | 0.87 (0.00*-4.36) | 0.48 (0.00*-2.42) | | | -44.58 (-95.15--35.32) | |  | -1.78 (-1.92--1.63) | | | -1.82 (-14.82-13.17) |
| Uganda | |  | 45.83 (0.00*-233.84) | | 68.97 (0.00*-355.62) | | 50.50 (-87.73-96.01) | | |  | 0.75 (0.00*-3.82) | 0.50 (0.00*-2.58) | | | -33.14 (-91.79--13.07) | |  | -1.94 (-2.24--1.64) | | | -1.75 (-3.17--0.31) |
| United Republic of Tanzania | |  | 80.82 (0.00*-398.45) | | 122.22 (0.00*-616.37) | | 51.23 (-110.19-99.19) | | |  | 0.78 (0.00*-3.80) | 0.50 (0.00*-2.53) | | | -35.01 (-100.65--15.39) | |  | -1.60 (-1.68--1.51) | | | -1.56 (-2.72--0.38) |
| Zambia | |  | 23.51 (0.00*-121.51) | | 38.85 (0.00*-209.29) | | 65.22 (-92.26-116.03) | | |  | 0.86 (0.00*-4.45) | 0.59 (0.00*-3.10) | | | -31.35 (-96.08--11.50) | |  | -1.68 (-1.96--1.41) | | | -1.56 (-3.1-0.02) |
| Lesotho | |  | 5.24 (0.00*-29.40) | | 8.71 (0.00*-49.60) | | 66.41 (-77.99-249.24) | | |  | 0.64 (0.00*-3.64) | 0.81 (-0.00*-4.67) | | | 27.17 (-88.80-127.67) | |  | 1.49 (1.06-1.93) | | | 1.74 (-1.72-5.32) |
| Botswana | |  | 3.84 (0.00*-21.75) | | 4.95 (0.00*-27.94) | | 28.83 (-78.84-125.01) | | |  | 0.72 (0.00*-4.04) | 0.36 (-0.00*-2.01) | | | -50.49 (-96.59--24.11) | |  | -2.34 (-2.56--2.12) | | | -2.35 (-6.43-1.91) |
| South Africa | |  | 102.46 (0.00*-567.57) | | 166.13 (0.00*-930.99) | | 62.14 (-95.06-87.41) | | |  | 0.49 (0.00*-2.72) | 0.37 (0.00*-2.09) | | | -24.36 (-96.19--12.20) | |  | -1.14 (-1.46--0.82) | | | -1.37 (-2.09--0.64) |
| Namibia | |  | 1.50 (0.00*-8.17) | | 2.41 (-0.00*-13.16) | | 60.49 (-86.87-149.40) | | |  | 0.24 (0.00*-1.28) | 0.18 (0.00*-0.97) | | | -25.65 (-94.60-20.78) | |  | -1.15 (-1.46--0.83) | | | -1.03 (-7.34-5.7) |
| Eswatini | |  | 2.13 (-0.00*-12.08) | | 3.47 (-0.00*-19.86) | | 62.63 (-145.13-166.61) | | |  | 0.77 (-0.00*-4.28) | 0.62 (-0.00*-3.49) | | | -19.86 (-107.46-23.61) | |  | -0.27 (-0.84-0.30) | | | 0.05 (-5-5.38) |
| Zimbabwe | |  | 33.02 (0.00*-174.90) | | 68.89 (0.00*-371.76) | | 108.64 (-43.20-362.89) | | |  | 0.88 (0.00*-4.65) | 1.02 (0.00*-5.37) | | | 16.59 (-71.85-164.64) | |  | 1.11 (0.60-1.61) | | | 1.41 (0.13-2.7) |
| Benin | |  | 17.97 (0.00*-95.28) | | 34.48 (0.00*-179.23) | | 91.95 (-118.17-370.52) | | |  | 0.94 (0.00*-4.96) | 0.73 (0.00*-3.79) | | | -22.32 (-103.89-99.40) | |  | -0.55 (-0.72--0.37) | | | -0.76 (-2.67-1.19) |
| Burkina Faso | |  | 41.44 (0.00*-222.73) | | 74.23 (0.00*-417.07) | | 79.12 (-50.18-794.13) | | |  | 1.03 (0.00*-5.50) | 0.87 (0.00*-4.86) | | | -15.25 (-81.15-261.28) | |  | -0.21 (-0.39--0.02) | | | -0.41 (-1.94-1.14) |
| Cabo Verde | |  | 5.43 (0.00*-28.61) | | 7.52 (-0.00*-40.54) | | 38.50 (-121.10-466.85) | | |  | 2.31 (0.00*-12.26) | 1.78 (-0.00*-9.63) | | | -23.12 (-109.37-181.51) | |  | -1.10 (-1.60--0.59) | | | -1.63 (-5.76-2.69) |
| Cameroon | |  | 37.90 (0.00*-204.78) | | 87.21 (-0.00*-494.51) | | 130.12 (-131.78-732.63) | | |  | 0.92 (-0.00*-4.93) | 0.76 (0.00*-4.29) | | | -17.32 (-162.10-190.28) | |  | -0.39 (-0.52--0.25) | | | -0.49 (-1.86-0.91) |
| Côte d'Ivoire | |  | 12.42 (0.00*-64.27) | | 26.81 (0.00*-143.01) | | 115.83 (-135.87-457.27) | | |  | 0.34 (0.00*-1.78) | 0.26 (0.00*-1.35) | | | -23.78 (-87.23-102.90) | |  | -0.81 (-1.00--0.62) | | | -0.64 (-3.28-2.07) |
| Chad | |  | 23.29 (0.00*-126.12) | | 53.22 (0.00*-293.53) | | 128.53 (-47.60-820.42) | | |  | 0.86 (0.00*-4.63) | 1.00 (0.00*-5.48) | | | 15.86 (-84.63-371.73) | |  | 0.72 (0.58-0.85) | | | 0.58 (-1.22-2.42) |
| Ghana | |  | 41.82 (0.00*-222.03) | | 91.16 (0.00*-470.17) | | 117.95 (-270.45-1538.95) | | |  | 0.73 (0.00*-3.87) | 0.61 (0.00*-3.13) | | | -16.25 (-156.62-532.48) | |  | -0.38 (-0.45--0.31) | | | -0.63 (-1.92-0.68) |
| Gambia | |  | 1.01 (0.00*-5.55) | | 2.40 (0.00*-12.76) | | 137.93 (-96.42-676.18) | | |  | 0.30 (0.00*-1.64) | 0.26 (0.00*-1.36) | | | -14.84 (-102.56-201.08) | |  | -0.54 (-0.68--0.41) | | | -0.59 (-10.26-10.13) |
| Guinea | |  | 25.40 (-0.00*-135.56) | | 38.66 (0.00*-208.80) | | 52.18 (-118.90-550.07) | | |  | 0.79 (0.00*-4.23) | 0.71 (0.00*-3.81) | | | -10.19 (-109.76-304.38) | |  | -0.13 (-0.28-0.02) | | | -0.13 (-1.84-1.6) |
| Guinea-Bissau | |  | 5.44 (-0.00*-30.26) | | 7.92 (0.00*-42.96) | | 45.60 (-81.49-466.94) | | |  | 1.42 (-0.00*-7.80) | 1.18 (-0.00*-6.36) | | | -16.67 (-101.82-229.44) | |  | -0.18 (-0.36--0.01) | | | -0.36 (-5.71-5.3) |
| Mali | |  | 61.44 (0.00*-329.34) | | 103.87 (0.00*-545.61) | | 69.06 (-100.67-566.37) | | |  | 1.62 (0.00*-8.69) | 1.25 (0.00*-6.52) | | | -23.23 (-106.21-202.55) | |  | -0.59 (-0.70--0.47) | | | -0.72 (-2.01-0.59) |
| Liberia | |  | 8.96 (0.00*-48.68) | | 14.33 (0.00*-78.88) | | 59.99 (-62.47-640.70) | | |  | 0.83 (0.00*-4.48) | 0.75 (0.00*-4.11) | | | -9.75 (-92.94-354.78) | |  | -0.23 (-0.39--0.06) | | | -0.28 (-3.32-2.84) |
| Mauritania | |  | 8.52 (0.00*-45.77) | | 13.17 (0.00*-71.41) | | 54.54 (-82.78-455.85) | | |  | 0.90 (0.00*-4.84) | 0.67 (0.00*-3.58) | | | -26.28 (-94.87-167.49) | |  | -0.82 (-1.09--0.55) | | | -1.23 (-4.64-2.31) |
| Nigeria | |  | 107.97 (0.00*-583.78) | | 149.55 (0.00*-825.15) | | 38.52 (-48.17-195.55) | | |  | 0.26 (0.00*-1.40) | 0.18 (0.00*-0.97) | | | -29.57 (-71.60-58.61) | |  | -1.07 (-1.19--0.95) | | | -1.14 (-2--0.27) |
| Niger | |  | 24.84 (0.00*-133.03) | | 61.92 (0.00*-338.79) | | 149.28 (-57.08-1087.38) | | |  | 0.97 (0.00*-5.22) | 0.85 (0.00*-4.69) | | | -12.51 (-85.96-253.81) | |  | -0.09 (-0.26-0.09) | | | -0.39 (-2.47-1.73) |
| Senegal | |  | 27.63 (0.00*-148.91) | | 55.86 (0.00*-305.90) | | 102.16 (-154.80-606.50) | | |  | 0.91 (0.00*-4.85) | 0.78 (0.00*-4.27) | | | -13.60 (-109.78-212.85) | |  | -0.18 (-0.42-0.06) | | | -0.47 (-2.18-1.27) |
| Togo | |  | 10.12 (0.00*-54.41) | | 29.90 (0.00*-170.41) | | 195.49 (-13.31-1411.33) | | |  | 0.88 (0.00*-4.73) | 0.86 (0.00*-4.82) | | | -1.79 (-77.07-381.77) | |  | 0.26 (0.09-0.42) | | | 0.09 (-2.58-2.84) |
| Sao Tome and Principe | |  | 0.74 (0.00*-3.90) | | 1.09 (0.00*-5.69) | | 46.61 (-107.93-696.69) | | |  | 1.23 (0.00*-6.42) | 1.12 (0.00*-5.84) | | | -8.28 (-103.52-354.41) | |  | -0.22 (-0.38--0.06) | | | -0.48 (-10.65-10.85) |
| Sierra Leone | |  | 16.37 (-0.00*-89.39) | | 27.00 (-0.00*-148.77) | | 64.91 (-82.88-562.46) | | |  | 0.84 (-0.00*-4.56) | 0.77 (-0.00*-4.24) | | | -8.38 (-97.74-235.58) | |  | 0.18 (-0.02-0.38) | | | 0.11 (-2.08-2.35) |
| Bermuda | |  | 0.61 (-0.00*-3.19) | | 0.54 (-0.00*-2.89) | | -12.45 (-87.22-85.22) | | |  | 1.01 (-0.00*-5.26) | 0.37 (-0.00*-2.01) | | | -63.21 (-97.56--34.04) | |  | -3.11 (-3.35--2.86) | | | -3.24 (-20.05-17.11) |
| American Samoa | |  | 0.28 (0.00*-1.60) | | 0.53 (-0.00*-2.81) | | 87.18 (-42.23-1227.20) | | |  | 1.46 (0.00*-7.89) | 1.26 (-0.00*-6.61) | | | -13.37 (-102.93-304.04) | |  | -0.38 (-0.46--0.29) | | | -0.41 (-13.61-14.81) |
| Greenland | |  | 0.52 (0.00*-2.63) | | 0.45 (0.00*-2.35) | | -12.21 (-96.22-249.26) | | |  | 1.54 (0.00*-7.86) | 0.68 (0.00*-3.53) | | | -55.90 (-118.09-105.54) | |  | -2.60 (-2.75--2.45) | | | -2.61 (-19.61-17.97) |
| Cook Islands | |  | 0.10 (0.00*-0.53) | | 0.12 (0.00*-0.62) | | 20.15 (-105.67-66.62) | | |  | 0.93 (0.00*-4.74) | 0.49 (0.00*-2.48) | | | -46.79 (-104.11--30.78) | |  | -2.00 (-2.14--1.86) | | | -1.76 (-26.98-32.16) |
| Monaco | |  | 0.66 (-0.00*-3.47) | | 0.55 (-0.00*-2.96) | | -16.09 (-117.37-210.03) | | |  | 0.89 (-0.00*-4.66) | 0.53 (-0.00*-2.81) | | | -40.16 (-108.73-111.22) | |  | -1.65 (-1.79--1.52) | | | -1.67 (-19.06-19.47) |
| Guam | |  | 0.45 (0.00*-2.31) | | 0.80 (-0.00*-4.10) | | 78.57 (-82.17-133.26) | | |  | 0.74 (0.00*-3.74) | 0.38 (-0.00*-1.96) | | | -48.74 (-95.47--40.76) | |  | -1.66 (-2.12--1.19) | | | -1.26 (-13.49-12.69) |
| Niue | |  | 0.03 (-0.00*-0.13) | | 0.02 (0.00*-0.10) | | -27.55 (-89.27--5.74) | | |  | 1.16 (-0.00*-5.68) | 0.92 (0.00*-4.57) | | | -20.47 (-87.93-3.87) | |  | -0.92 (-0.97--0.87) | | | -0.88 (-49.83-95.82) |
| Nauru | |  | 0.09 (-0.00*-0.45) | | 0.09 (-0.00*-0.46) | | 2.94 (-74.15-48.81) | | |  | 2.07 (-0.00*-10.65) | 1.64 (-0.00*-8.29) | | | -20.67 (-101.97-6.46) | |  | -0.84 (-1.09--0.58) | | | -0.6 (-35.71-53.69) |
| Palau | |  | 0.17 (-0.00*-0.92) | | 0.29 (0.00*-1.48) | | 63.58 (-137.57-120.31) | | |  | 1.97 (0.00*-10.21) | 1.49 (0.00*-7.57) | | | -24.46 (-98.74--1.58) | |  | -0.76 (-0.83--0.68) | | | -0.68 (-18.07-20.41) |
| Northern Mariana Islands | |  | 0.20 (-0.00*-1.06) | | 0.48 (0.00*-2.39) | | 143.50 (-128.57-350.63) | | |  | 1.38 (0.00*-7.05) | 1.10 (0.00*-5.55) | | | -20.32 (-109.25-3.96) | |  | -0.68 (-0.96--0.41) | | | -0.74 (-18.12-20.32) |
| Saint Kitts and Nevis | |  | 0.49 (-0.00*-2.50) | | 0.43 (-0.00*-2.37) | | -12.79 (-98.96-31.16) | | |  | 1.31 (-0.00*-6.72) | 0.69 (-0.00*-3.84) | | | -47.15 (-100.13--22.26) | |  | -1.77 (-1.96--1.58) | | | -2.4 (-18.54-16.93) |
| Puerto Rico | |  | 33.15 (-0.00*-169.99) | | 24.20 (-0.00*-126.29) | | -27.00 (-104.69-2.00) | | |  | 0.93 (-0.00*-4.77) | 0.32 (-0.00*-1.69) | | | -65.48 (-107.86--56.22) | |  | -3.70 (-3.84--3.55) | | | -3.32 (-5.46--1.14) |
| San Marino | |  | 0.73 (0.00*-3.79) | | 0.60 (0.00*-3.27) | | -18.71 (-81.36-122.50) | | |  | 2.02 (0.00*-10.43) | 0.71 (0.00*-3.94) | | | -64.86 (-90.57-11.34) | |  | -2.54 (-2.88--2.21) | | | -2.39 (-17.99-16.16) |
| Tuvalu | |  | 0.11 (-0.00*-0.59) | | 0.11 (0.00*-0.59) | | 4.49 (-137.06-41.63) | | |  | 1.77 (0.00*-9.49) | 1.18 (0.00*-6.12) | | | -33.27 (-91.00--14.29) | |  | -1.22 (-1.30--1.15) | | | -1.15 (-27.87-35.46) |
| Tokelau | |  | 0.02 (0.00*-0.10) | | 0.01 (-0.00*-0.06) | | -29.92 (-96.91--4.28) | | |  | 1.39 (-0.00*-7.41) | 0.86 (-0.00*-4.39) | | | -38.65 (-96.67--17.42) | |  | -1.66 (-1.69--1.63) | | | -1.49 (-56.57-123.42) |
| South Sudan | |  | 22.41 (-0.00*-116.02) | | 27.40 (0.00*-144.25) | | 22.28 (-99.28-64.43) | | |  | 0.90 (0.00*-4.63) | 0.75 (0.00*-3.94) | | | -16.12 (-97.27-11.84) | |  | -0.81 (-0.98--0.63) | | | -0.75 (-2.95-1.5) |
| Sudan | |  | 103.56 (-0.00*-622.00) | | 150.23 (-0.00*-953.14) | | 45.07 (-98.38-575.54) | | |  | 1.10 (-0.00*-6.66) | 0.78 (-0.00*-5.00) | | | -28.93 (-99.34-208.63) | |  | -1.16 (-1.22--1.11) | | | -1.17 (-2.17--0.16) |
| United States Virgin Islands | |  | 0.70 (0.00*-3.68) | | 0.74 (-0.00*-3.83) | | 4.92 (-122.27-92.04) | | |  | 0.91 (-0.00*-4.64) | 0.42 (-0.00*-2.15) | | | -54.01 (-108.33--27.11) | |  | -2.43 (-2.61--2.24) | | | -1.96 (-13.28-10.84) |
|  |  | |  |  | |  | | |  | | | |  |  | |  | | |  |  | | |

ASMR, Age-standardized mortality rate; EAPC, estimated annual percentage changes; Net drift , overall annual percentage change; SDI, Socio-demographic Index; UI, uncertainty interval; CI, confidence interval.

When the sample size was small, the lower limit of the 95% uncertainty interval (UI) appeared as '0.00'. We marked this with an asterisk '*', indicating that the lower limit is very small, but the actual value is not zero.
